# Supplementary material for: Transcriptome Analysis of Sucrose Metabolism during Bulb Swelling and Development in Onion (Allium cepa L.)
Source: Front Plant Sci. 2016 Sep 22;7:1425. doi: 10.3389/fpls.2016.01425 (PMC5031786; doi:10.3389/fpls.2016.01425)
Supplement: Supplementary file 9 [file Table5.xlsx]

## Sheet: Sheet1
Supplementary Table S5: List of all differentially expressed genes in the three developmental stages of onion.
Differential expression genes (DEGs) analysis was carried out on the raw uniquely mapped reads using the software DESeq with the following parameters: false discovery rate (FDR) < 0.01, |log2 (fold change)| > 1 or < -1.
Gene ID	15 DAS (FPKM)	30 DAS (FPKM)	40 DAS (FPKM)
c10004.graph_c0	4.45918	0.795768	0.318504
c10011.graph_c0	0.572377	1.37895	13.1059
c10017.graph_c1	5.59745	1.6403	0.183971
c10030.graph_c0	1.83891	0.7999	2.85093
c10031.graph_c0	8.86242	0	3.61477
c10047.graph_c0	0	0	7.36198
c10049.graph_c0	3.71916	0.780832	5.38883
c10054.graph_c0	0.774029	4.42017	0
c10057.graph_c0	1.72293	18.1405	3.88527
c10064.graph_c0	0.67096	4.1799	0.825294
c10066.graph_c0	0.95919	4.10816	0.285232
c10079.graph_c0	0	4.01456	6.02307
c10099.graph_c0	2.38872	3.89213	0.32428
c10105.graph_c0	2.11648	6.39867	1.87887
c10106.graph_c0	2.85402	0.743694	0.0788609
c10121.graph_c0	0.758177	10.729	0.341233
c10137.graph_c0	0	6.20537	0
c10143.graph_c0	8.67013	1.98494	0.296834
c10144.graph_c0	1.0756	0.94229	4.27435
c10148.graph_c0	15.0849	0	0
c10166.graph_c0	1.12793	4.50149	4.4823
c10176.graph_c0	2.75952	0	5.29065
c10183.graph_c0	0.79597	0.608768	4.20135
c10228.graph_c0	0.79121	6.21263	1.64696
c10231.graph_c0	4.90721	0.364162	3.18578
c10237.graph_c0	0	5.32785	0.184958
c10246.graph_c0	4.36709	0	1.59317
c10246.graph_c1	3.45056	0	1.09734
c10248.graph_c0	5.85146	1.99959	0.453519
c10265.graph_c0	2.08759	2.74618	0.186235
c10273.graph_c0	8.08623	0	1.97413
c10276.graph_c0	3.69988	1.02041	0.233381
c10283.graph_c0	0.66892	1.96965	5.91772
c10297.graph_c0	1.3366	2.76006	7.05493
c10297.graph_c1	2.88269	2.72347	7.32416
c10314.graph_c0	1.24371	4.92725	1.81222
c10320.graph_c0	8.97783	1.51384	0
c10323.graph_c0	3.72214	0	1.81592
c10327.graph_c0	3.28208	2.32394	0
c10332.graph_c0	1.78632	6.92209	3.12815
c10333.graph_c0	0.722958	2.54346	2.20359
c10334.graph_c0	10.3783	2.10753	3.10391
c10336.graph_c0	1.28142	4.47028	1.46275
c10338.graph_c0	0	1.27035	3.78163
c10340.graph_c0	8.91038	1.06007	1.20216
c10342.graph_c0	1.49515	4.70268	0.291775
c10347.graph_c0	4.55384	0	0
c10356.graph_c0	3.7847	0.644703	0
c10359.graph_c0	0	7.59439	0
c10360.graph_c0	3.52429	1.90585	4.92776
c10361.graph_c0	0.774647	4.56194	3.86996
c10366.graph_c0	0.282354	6.04654	0.440806
c10371.graph_c0	6.12029	0.126024	0.183748
c10372.graph_c0	1.05238	0.717069	3.38548
c10378.graph_c0	4.49324	0.123361	0
c10382.graph_c0	0	4.51736	0
c10391.graph_c0	1.37382	4.4665	1.35186
c10397.graph_c0	1.03673	0.666038	6.04247
c10399.graph_c0	6.50744	3.16716	0.153928
c10414.graph_c0	4.60921	0.803412	2.93782
c10425.graph_c0	2.76738	0.253983	1.97503
c10430.graph_c0	8.69785	0.640276	0.113157
c10440.graph_c0	7.79801	0.987932	0.681502
c10443.graph_c0	3.51773	0.982583	0.318366
c10447.graph_c0	3.16284	0	6.66809
c10464.graph_c0	0	3.57747	3.59731
c10474.graph_c0	1.16026	4.29639	2.01263
c10476.graph_c0	2.26615	0.647053	3.61648
c10480.graph_c0	0.371589	2.7188	2.70721
c10498.graph_c0	1.39396	0.864114	4.42879
c10499.graph_c0	0.744021	0	4.18158
c10502.graph_c0	8.24386	0.189828	0.184518
c10503.graph_c0	0.30401	6.75443	2.61038
c10508.graph_c0	0.447136	2.92578	1.60295
c10509.graph_c1	3.44946	0	1.74068
c10517.graph_c0	10.6616	0	0
c10525.graph_c0	7.41975	0.425603	2.34429
c10527.graph_c0	0.146113	2.34673	7.90778
c10547.graph_c0	7.02531	0.451335	0.438711
c10552.graph_c0	3.35409	0.0970633	0.377393
c10556.graph_c0	1.25236	2.68189	4.3448
c10561.graph_c0	0	11.7055	0
c10564.graph_c0	0.720033	4.24031	1.3739
c10566.graph_c0	6.14588	1.67304	0.487872
c10579.graph_c0	7.81601	0	0
c10592.graph_c0	0	15.8854	1.44116
c10607.graph_c0	1.69613	2.1366	5.86706
c10628.graph_c0	4.41523	6.99284	0.861622
c10637.graph_c0	3.39335	0	1.13108
c10638.graph_c0	0.55418	2.72955	5.94086
c10639.graph_c0	3.84769	0.249689	0.242705
c10663.graph_c0	6.84932	1.18015	0.901327
c10668.graph_c0	2.42618	12.989	9.09048
c10704.graph_c0	10.7027	13.1665	31.7586
c10705.graph_c0	0.383936	3.24308	0.665992
c10717.graph_c0	3.28484	0.103447	0.100553
c10723.graph_c0	25.7573	3.3921	22.7938
c10724.graph_c0	36.3492	8.61299	15.2334
c10727.graph_c0	11.1183	37.9609	12.375
c10733.graph_c0	0.125661	3.09464	0.392358
c10735.graph_c0	7.42041	35.4054	20.2561
c10750.graph_c0	8.75074	1.48865	0
c10757.graph_c0	10.12	34.5519	12.0232
c10773.graph_c0	2.25108	0.337444	0.0468579
c10776.graph_c0	0.0866861	0	2.25554
c10780.graph_c0	12.1207	30.4795	18.8075
c10785.graph_c0	1.79727	7.42269	12.0251
c10795.graph_c0	4.28057	35.521	16.3886
c10814.graph_c0	8.39943	26.6628	22.0316
c10842.graph_c0	22.4308	13.1584	30.1851
c10844.graph_c0	3.40443	16.0391	19.4881
c10847.graph_c0	10.5422	28.1587	12.8339
c10856.graph_c0	28.7596	11.1588	25.9694
c10875.graph_c0	1.97422	4.59537	0.0893367
c10879.graph_c0	11.774	26.6476	21.8368
c10891.graph_c0	3.62558	14.6039	10.6016
c10893.graph_c0	25.2819	32.7067	9.37176
c10895.graph_c0	31.0118	31.6159	4.03459
c10916.graph_c0	19.2359	8.60164	19.4068
c10926.graph_c0	3.0777	0	0.256258
c10934.graph_c0	20.6083	4.50259	20.7139
c10954.graph_c0	0	3.72506	1.91693
c10991.graph_c0	12.2879	49.6972	24.1008
c11005.graph_c0	57.9691	10.938	11.6568
c11020.graph_c0	0	4.84801	0.3366
c11024.graph_c0	5.5432	31.8663	9.69016
c11054.graph_c0	1.0354	5.35843	55.6776
c11064.graph_c0	6.87615	7.8107	69.5746
c11068.graph_c0	10.8527	31.1231	25.3553
c11069.graph_c0	0.966439	8.6547	31.273
c11074.graph_c0	2.55268	0	0.106272
c11094.graph_c0	16.611	19.8844	4.89147
c11097.graph_c0	10.3045	42.2947	33.0057
c11109.graph_c0	11.2907	31.0869	27.0997
c11143.graph_c0	0	0	7.03404
c11176.graph_c0	9.00325	24.2671	20.9165
c11182.graph_c0	1.63026	0.299242	0
c11192.graph_c0	10.6438	30.7882	19.5435
c11215.graph_c0	10.4679	24.375	31.7934
c11245.graph_c0	34.8014	1.87035	2.65713
c11249.graph_c0	2.79475	0	0.342205
c11259.graph_c0	7.86249	19.3788	19.1455
c11264.graph_c0	10.946	45.4655	26.2521
c11269.graph_c0	0.75616	2.19762	19.8999
c11281.graph_c0	6.85867	30.45	30.1206
c11286.graph_c0	2.69414	0.151827	0
c11299.graph_c0	45.0484	10.9333	9.62027
c11320.graph_c0	13.423	27.1923	7.43027
c11339.graph_c0	29.7669	2.86495	4.35127
c11341.graph_c0	21.7633	0	18.708
c11348.graph_c0	0	1.17611	1.91896
c11361.graph_c0	0.0908208	2.52837	0.3781
c11365.graph_c0	2.66213	19.478	23.5511
c11403.graph_c0	1.28451	26.5332	20.8891
c11407.graph_c0	0.561764	0.10025	2.14381
c11440.graph_c0	2.91112	0.292223	0.094683
c11473.graph_c0	5.0415	16.9238	19.854
c11481.graph_c0	4.73151	0	0
c11486.graph_c0	5.20131	0	2.1402
c11569.graph_c0	6.98011	6.63627	31.9401
c11571.graph_c0	2.27667	1.37121	0
c11586.graph_c0	2.50224	8.98332	18.659
c11587.graph_c0	0.5233	54.3872	0.5256
c11603.graph_c0	0.225686	17.8821	8.69098
c11613.graph_c0	3.86033	13.8764	29.5594
c11622.graph_c0	3.12548	4.80737	0.826148
c11623.graph_c0	30.3099	6.98376	9.42391
c11630.graph_c0	24.9771	4.54802	4.79866
c11634.graph_c0	13.5042	18.4069	3.50333
c11722.graph_c0	20.7085	29.1253	7.41993
c11744.graph_c0	8.46924	18.8237	25.6427
c11770.graph_c0	2.03423	2.35238	0
c11779.graph_c0	5.66325	20.7537	18.845
c11782.graph_c0	1.76022	2.92134	6.50366
c11801.graph_c0	2.07832	0	0
c11807.graph_c0	55.4358	1.40728	0.0488542
c11845.graph_c0	1.20768	9.83303	19.2993
c11848.graph_c0	14.7001	25.0555	4.5795
c11868.graph_c0	0	3.48387	0
c11892.graph_c0	7.16482	26.8507	15.3802
c11902.graph_c0	10.2156	0	0
c11920.graph_c0	9.26773	26.7929	12.0036
c11922.graph_c0	1.33867	12.349	8.78833
c11950.graph_c0	3.99808	0.147617	0
c11951.graph_c0	21.4502	1.95149	27.4321
c11958.graph_c0	1.69245	13.0879	2.9358
c11958.graph_c1	6.93117	41.6911	13.7912
c11988.graph_c0	0.704539	1.44017	0.0333307
c11999.graph_c0	60.3624	140.068	88.1517
c12015.graph_c0	23.6202	53.5415	64.0741
c12023.graph_c0	10.7386	26.9791	18.9193
c12049.graph_c0	0.165063	2.12087	0.257693
c12070.graph_c0	0.217141	1.86001	0.753325
c12093.graph_c0	0.693764	3.93704	1.87736
c12110.graph_c0	0	0	3.01035
c12117.graph_c0	190.58	31.9995	70.7256
c12122.graph_c0	33.317	120.681	91.6211
c12147.graph_c0	21.1478	42.6183	63.4366
c12159.graph_c0	2.65965	0.0662276	0
c12162.graph_c0	35.1151	140.056	57.4478
c12172.graph_c0	3.08372	0	0
c12178.graph_c0	53.1857	19.9226	48.2047
c12186.graph_c0	18.8784	51.3986	41.9993
c12214.graph_c0	1.96356	56.7662	35.6178
c12222.graph_c0	0.0670268	124.589	46.0768
c12227.graph_c0	21.8241	31.0037	111.594
c12243.graph_c0	23.5344	111.519	61.0619
c12271.graph_c0	16.4372	106.81	62.0151
c12295.graph_c0	29.0953	67.039	39.9927
c12315.graph_c0	14.6513	45.7557	33.3569
c12330.graph_c0	92.9691	19.8362	27.7878
c12335.graph_c0	20.9128	64.0184	45.4848
c12347.graph_c0	45.1038	546.66	115.595
c12350.graph_c0	85.3985	220.565	226.441
c12372.graph_c0	2.16372	0.0681403	0.198703
c12384.graph_c1	4.18468	0	0
c12464.graph_c0	0.850889	2.59307	1.10699
c12477.graph_c0	236.991	586.992	740.927
c12483.graph_c0	26.7533	79.5714	80.0176
c12499.graph_c0	147.222	1530.17	1699.32
c12523.graph_c0	3.72402	0.453119	0.0880889
c12535.graph_c0	1.52934	5.66308	5.10675
c12551.graph_c0	15.934	245.601	171.128
c12559.graph_c1	3.91871	13.8788	14.118
c12563.graph_c0	0	4.1986	0
c12606.graph_c0	63.8901	147.182	142.874
c12608.graph_c0	39.309	153.586	76.7568
c12611.graph_c0	0	2.05563	0.608128
c12616.graph_c0	46.7057	173.532	100.234
c12648.graph_c0	37.7143	97.7078	117.758
c12651.graph_c1	0	0	3.25634
c12653.graph_c0	59.5388	137.301	149.075
c12661.graph_c0	66.8158	201.419	106.772
c12662.graph_c0	83.6535	295.754	139.063
c12673.graph_c0	19.2951	46.9544	64.2017
c12680.graph_c0	16.0322	37.4136	44.0683
c12680.graph_c1	35.8125	89.3475	97.3142
c12696.graph_c0	229.494	63.5157	218.868
c12701.graph_c0	63.3453	132.124	186.926
c12717.graph_c0	458.366	1424.15	950.686
c12741.graph_c0	7.33286	438.803	60.7331
c12756.graph_c0	47.7414	319.665	147.859
c12778.graph_c0	2.22736	0.136281	0.331172
c12785.graph_c0	4.11174	0	0
c12789.graph_c0	0	2.71208	0
c12798.graph_c1	2.29636	0.144635	0.140589
c12812.graph_c0	0	0.319716	15.3522
c12838.graph_c0	109.941	3.60183	1.07726
c12845.graph_c0	2.33389	1.7354	0
c12846.graph_c0	3.77782	0.132624	0.193372
c12847.graph_c0	12.471	35.82	18.211
c12863.graph_c1	2.70253	0	0.234397
c12881.graph_c0	10.9847	41.9502	41.3485
c12894.graph_c1	0	0	4.0235
c12911.graph_c0	15.3964	44.6459	32.7331
c12928.graph_c0	7.59834	21.536	23.1045
c12933.graph_c0	7.39824	23.274	30.3911
c12951.graph_c0	2.63329	14.0978	13.415
c12963.graph_c0	0	4.6311	0
c13036.graph_c0	7.82257	18.9505	27.0709
c13053.graph_c0	14.8139	13.808	30.0991
c13075.graph_c1	2.68936	0.0959864	0
c13117.graph_c0	2.74655	4.03314	0.653389
c13122.graph_c0	0.716804	7.67508	1.2434
c13133.graph_c0	8.94395	17.0034	43.7574
c13148.graph_c0	42.9794	23.3023	99.3209
c13173.graph_c0	27.8261	64.9858	42.5311
c13175.graph_c0	29.0629	29.9626	81.7546
c13177.graph_c0	987.745	15.487	2.67084
c13198.graph_c0	26.0415	59.4059	41.2518
c13200.graph_c0	9.09388	28.9951	32.4958
c13203.graph_c0	45.2745	129.172	118.973
c13211.graph_c1	18.5849	43.4	45.1335
c13220.graph_c0	52.6979	170.791	38.357
c13227.graph_c0	33.2308	105.615	131.482
c13230.graph_c0	21.2394	64.4613	43.3272
c13232.graph_c0	14.5849	0	22.3556
c13234.graph_c0	27.3822	0.393545	0
c13234.graph_c1	328.276	5.52823	0.544162
c13248.graph_c0	5.37291	30.0798	16.6164
c13248.graph_c1	15.7245	78.8269	52.4983
c13255.graph_c0	19.9934	82.7171	31.5211
c13282.graph_c0	22.1811	78.3714	46.713
c13285.graph_c0	18.7154	49.4238	54.4094
c13287.graph_c0	44.0849	93.3162	27.598
c13290.graph_c0	27.0696	48.8868	94.2456
c13293.graph_c0	2.38503	0	2.21635
c13294.graph_c0	17.6654	30.2462	78.4871
c13305.graph_c0	16.9304	33.6369	48.2703
c13324.graph_c0	0.230911	3.15237	4.56625
c13343.graph_c0	2.02474	0.166766	0.162102
c13378.graph_c0	0	3.0448	0
c13400.graph_c0	13.7284	31.1808	20.0133
c13413.graph_c0	17.336	47.1124	36.3151
c13425.graph_c0	56.9295	12.3364	14.3426
c13426.graph_c0	15.5399	51.401	41.7219
c13435.graph_c0	24.8765	56.1423	40.5367
c13448.graph_c0	65.9987	62.5446	12.8959
c13468.graph_c0	13.8052	96.5474	102.39
c13474.graph_c0	4.23023	0.421345	0.30717
c13491.graph_c0	71.0579	12.6072	0
c13494.graph_c0	17.1799	42.8759	34.0583
c13500.graph_c0	2.56932	0	0
c13501.graph_c0	43.4303	0	66.815
c13524.graph_c0	22.8632	60.0167	54.2441
c13526.graph_c0	17.1746	73.3974	49.9957
c13540.graph_c0	53.6871	186.168	94.6462
c13577.graph_c0	4.22841	70.1303	28.7404
c13580.graph_c0	51.1613	124.275	136.136
c13582.graph_c0	23.7372	0	35.3029
c13594.graph_c0	79.0139	222.272	194.216
c13598.graph_c1	2.36201	0.190875	0.046384
c13600.graph_c0	2.46026	0	0
c13603.graph_c0	19.1345	28.5006	61.6178
c13624.graph_c0	5.07479	5.2996	16.7582
c13638.graph_c0	38.1625	12.9783	4.04902
c13640.graph_c0	140.919	22.3442	20.1729
c13643.graph_c0	5.03803	15.872	5.54602
c13664.graph_c0	27.7295	43.1669	10.4366
c13669.graph_c0	13.6832	8.43828	0
c13685.graph_c0	0	5.27193	0
c13706.graph_c0	1.88175	0.140572	0.227733
c13710.graph_c0	0.687997	0.491109	3.10292
c13732.graph_c0	15.6788	3.54484	2.73055
c13754.graph_c0	1.15155	6.78154	0.898889
c13758.graph_c0	0.477156	4.42787	4.80063
c13761.graph_c0	4.44773	13.8902	6.08317
c13762.graph_c0	21.1358	0.404123	0.0982048
c13803.graph_c0	1.98258	1.47418	0
c13805.graph_c0	8.01332	11.0639	0
c13821.graph_c0	30.7819	78.5093	56.6089
c13824.graph_c0	26.989	208.81	88.5142
c13833.graph_c0	4.08444	0.0344359	1.77405
c13838.graph_c0	2.04022	0.557755	0.0451795
c13855.graph_c0	5.9245	4.08569	10.5556
c13863.graph_c0	1.75336	6.88374	8.05985
c13890.graph_c0	5.90122	0	0.454956
c13913.graph_c0	0.094173	2.6217	0.196028
c13914.graph_c0	1.17576	15.0022	1.32569
c13919.graph_c0	14.6016	0.317631	1.68095
c13943.graph_c0	2.53135	0	0
c13977.graph_c0	7.72151	21.6419	4.01822
c13982.graph_c0	0.577429	0.741929	9.0147
c13988.graph_c0	4.62532	20.8985	20.4726
c14009.graph_c0	1.77699	20.4819	2.71981
c14020.graph_c0	0.0934469	2.60148	0
c14022.graph_c0	0	3.44278	1.95211
c14025.graph_c0	0.137027	3.08112	0
c14028.graph_c0	3.00031	11.2439	13.5316
c14031.graph_c0	76.9308	2.70629	0.246618
c14056.graph_c0	0.534363	3.43297	22.2463
c14061.graph_c0	3.39725	3.82652	11.7554
c14095.graph_c0	0.718743	5.96428	0
c14101.graph_c0	6.37705	2.93769	15.9755
c14106.graph_c0	6.36043	0.319235	0
c14114.graph_c0	1.0277	2.2508	0.194475
c14130.graph_c0	5.68138	0.971277	0.844729
c14147.graph_c0	0.428288	12.1525	2.05048
c14149.graph_c0	3.26832	0	0
c14151.graph_c0	0.277903	1.85976	1.08464
c14153.graph_c0	47.826	1.55572	0
c14166.graph_c0	4.3286	40.9276	3.20706
c14171.graph_c0	19.2722	4.144	4.11029
c14212.graph_c0	19.9254	3.77463	1.59524
c14222.graph_c0	3.54431	12.9494	6.61743
c14225.graph_c1	1.75547	2.34956	0
c14226.graph_c0	14.3159	10.9626	23.9412
c14235.graph_c0	1.0596	8.1421	12.65
c14243.graph_c0	1.72009	0.495859	9.91521
c14260.graph_c0	4.14969	0	0
c14278.graph_c0	3.47109	13.1208	9.46955
c14280.graph_c0	10.3712	0.108871	0
c14293.graph_c0	15.1883	45.554	31.0767
c14340.graph_c0	12.8916	45.2754	26.0834
c14341.graph_c0	3.09885	0.245781	0.238906
c14352.graph_c0	0.9625	53.8282	0.231175
c14377.graph_c0	2.15544	8.69903	41.9334
c14383.graph_c0	1.96413	0	0.845892
c14385.graph_c0	3.12071	0.257035	0.249846
c14387.graph_c0	1.61246	10.5198	4.56635
c14395.graph_c1	2.08044	0.171354	0.333122
c14422.graph_c0	7.00994	0	0
c14426.graph_c0	7.38233	0	8.11508
c14470.graph_c0	7.57744	5.11147	1.02524
c14474.graph_c0	3.55194	9.77963	5.05482
c14478.graph_c0	0.198772	3.72456	1.55159
c14480.graph_c0	0.22097	0.709801	2.75979
c14483.graph_c0	12.5727	7.05153	1.0682
c14484.graph_c0	19.131	5.03979	0
c14490.graph_c0	1.40581	2.15036	0
c14491.graph_c0	20.3414	57.1731	131.829
c14499.graph_c0	29.2815	17.2796	42.0773
c14512.graph_c0	57.4645	73.4901	179.648
c14522.graph_c0	3.57057	1.16818	0
c14531.graph_c0	8.6683	3.86727	0.107403
c14535.graph_c0	20.6214	0.349092	0
c14538.graph_c0	1.45899	2.82683	0.144619
c14571.graph_c0	2.0516	10.7839	6.40583
c14572.graph_c0	9.55138	2.2837	8.68627
c14581.graph_c0	3.20046	11.8136	6.95419
c14585.graph_c0	31.3227	75.746	75.0742
c14586.graph_c0	0	0	2.62407
c14591.graph_c0	371.456	13.0067	49.4309
c14593.graph_c0	19.7901	44.4659	49.0918
c14597.graph_c0	0	9.31165	7.39393
c14604.graph_c0	16.6031	0.595897	8.30227
c14610.graph_c0	2.39236	0.708525	0.185421
c14624.graph_c0	0	4.14834	0
c14647.graph_c0	0	2.66718	0
c14658.graph_c0	7.46184	0	9.20847
c14670.graph_c0	27.967	53.8096	110.52
c14686.graph_c0	0	7.95682	0
c14697.graph_c0	0.3866	2.0106	0.689774
c14708.graph_c0	5.15439	12.5149	4.83572
c14711.graph_c0	0	9.55194	5.0159
c14717.graph_c0	4.71199	0	0
c14725.graph_c0	2.8099	111.594	3.21696
c14754.graph_c0	8.09705	2.46405	12.774
c14758.graph_c0	0	30.5164	11.7505
c14765.graph_c0	2.55239	0	1.71891
c14774.graph_c0	25.1103	17.3743	43.7776
c14775.graph_c0	3.4703	0	0.180592
c14779.graph_c0	10.7146	26.0291	20.6246
c14786.graph_c0	59.3997	147.532	148.326
c14794.graph_c0	6.96757	16.0188	9.98826
c14797.graph_c0	2.92242	0.169143	0.164412
c14805.graph_c0	7.5574	21.6906	18.1437
c14811.graph_c0	2.28127	1.42014	0
c14814.graph_c0	10.124	22.9811	20.6524
c14816.graph_c0	27.5196	5.33846	1.11922
c14820.graph_c0	2.72995	0.171944	0.0835674
c14834.graph_c0	4.86423	0.144675	0.140628
c14843.graph_c1	0.454366	5.10832	1.41869
c14851.graph_c0	5.33529	6.52879	0.264424
c14855.graph_c0	6.97954	19.914	12.3919
c14862.graph_c0	12.1781	4.42412	10.8641
c14890.graph_c0	17.2966	5.02689	14.2088
c14892.graph_c0	1.91513	1.46471	0
c14893.graph_c0	18.68	2.92418	7.04912
c14896.graph_c0	4.18425	13.7462	14.4504
c14916.graph_c0	2.16652	7.04852	5.03012
c14926.graph_c0	3.00101	0	1.06854
c14938.graph_c0	0.105413	2.08809	0.493707
c14960.graph_c0	19.2639	4.03767	4.1377
c14974.graph_c0	3.6557	0	0.146339
c14976.graph_c0	2.04328	1.75025	0
c14986.graph_c0	22.4181	62.5846	31.3253
c14995.graph_c0	23.9007	0	0.185638
c15003.graph_c0	3.09097	0.73547	0.0714898
c15010.graph_c0	2.20566	0.488624	0.118739
c15026.graph_c0	0.193612	2.07307	1.41056
c15027.graph_c0	2.4153	0	1.16494
c15040.graph_c0	0.857128	4.58879	8.2072
c15062.graph_c0	6.52397	21.6949	5.44402
c15068.graph_c0	25.0224	7.13078	0
c15077.graph_c0	3.20274	0.367424	0.476195
c15100.graph_c0	0.738948	3.16487	6.15269
c15113.graph_c0	3.12855	15.0743	12.178
c15151.graph_c0	6.50049	19.1409	7.74486
c15152.graph_c0	3.31383	0.05218	0
c15156.graph_c0	2.5723	0	0.170886
c15165.graph_c0	2.44918	0.201725	0.196083
c15169.graph_c0	15.0781	15.1185	4.18926
c15170.graph_c0	0	0.138869	3.10465
c15173.graph_c1	2.3857	0.059406	0
c15186.graph_c0	0.480987	0.128752	3.12878
c15198.graph_c0	8.08183	8.29043	23.705
c15220.graph_c0	0.427581	0.640957	3.73817
c15222.graph_c0	0.238414	1.36148	1.90239
c15242.graph_c0	9.56492	29.7219	5.91733
c15246.graph_c0	2.24171	0.177799	0.172825
c15247.graph_c0	31.1738	102.699	80.6871
c15248.graph_c0	0.399478	2.56641	0.498925
c15255.graph_c0	3.94106	7.91218	18.4581
c15266.graph_c0	0	12.9821	15.7738
c15283.graph_c0	5.03744	17.9793	20.3891
c15293.graph_c0	1.29834	0.069509	1.62155
c15296.graph_c0	1.33326	1.14902	0.101535
c15298.graph_c0	25.7719	5.80741	2.00794
c15300.graph_c0	17.2227	12.9411	3.30201
c15305.graph_c0	10.2757	7.83633	21.1587
c15312.graph_c0	7.46258	80.4753	22.1913
c15318.graph_c0	6.2321	17.2861	9.51322
c15319.graph_c0	2.20032	0.257014	0.124913
c15341.graph_c0	0	2.38486	0.948336
c15367.graph_c0	2.19978	1.95446	0.0487127
c15370.graph_c0	0	1.38458	1.03997
c15376.graph_c0	17.9131	1.57031	8.50415
c15397.graph_c0	0.333534	2.14276	0.650882
c15413.graph_c0	91.1368	156.006	8.58547
c15421.graph_c0	72.575	4.37994	1.44203
c15422.graph_c0	0.409807	2.19398	0.781956
c15433.graph_c0	5.20988	9.22973	1.87318
c15444.graph_c0	116.78	15.9556	3.49021
c15471.graph_c0	26.3636	5.91319	3.4213
c15481.graph_c0	18.5786	44.2119	45.2531
c15482.graph_c0	32.9161	0.870234	0
c15482.graph_c1	9.57888	0.222966	0
c15508.graph_c0	0	0	33.276
c15511.graph_c0	0	0	3.47695
c15515.graph_c0	10.7559	3.53867	11.1946
c15523.graph_c0	16.4615	2.07364	2.85548
c15535.graph_c0	18.7796	4.25361	4.13464
c15553.graph_c0	2.25852	4.00743	0.268644
c15560.graph_c0	0.342379	15.3971	10.9279
c15571.graph_c0	7.18041	24.3117	47.2634
c15583.graph_c0	15.9347	10.4883	2.36924
c15615.graph_c0	15.7202	72.5776	75.8254
c15619.graph_c0	0.956043	15.1689	14.5637
c15630.graph_c0	29.8233	12.425	28.8226
c15655.graph_c0	3.3009	13.4812	12.1716
c15677.graph_c0	0.933849	0.142844	1.45791
c15681.graph_c0	8.29034	3.97467	0.128783
c15693.graph_c0	0	6.64594	10.3701
c15708.graph_c0	2.13654	0.332082	0.0717317
c15734.graph_c0	90.937	39.9836	93.0237
c15749.graph_c0	13.0112	5.54372	14.4791
c15765.graph_c0	0	40.3188	0
c15769.graph_c0	0	2.87432	0.11889
c15792.graph_c0	7.8642	20.8775	15.1227
c15793.graph_c0	2.92297	4.75048	9.77846
c15796.graph_c0	33.3507	10.8366	0
c15807.graph_c0	11.0107	1.36691	2.49126
c15818.graph_c0	4.36824	0	8.05363
c15827.graph_c0	10.4709	1.82187	1.97525
c15832.graph_c0	0.217013	6.39	2.14571
c15836.graph_c0	6.40464	17.0033	7.21374
c15837.graph_c0	0.147178	2.91539	0.842494
c15848.graph_c0	2.49318	3.53714	17.2559
c15850.graph_c0	17.026	2.56575	1.0501
c15852.graph_c0	0.330972	1.10745	7.06165
c15853.graph_c0	1.26143	56.8359	14.7568
c15858.graph_c0	0.418116	7.94654	7.07151
c15861.graph_c0	0.343895	9.10032	1.63621
c15869.graph_c0	1.28119	3.32123	3.81318
c15878.graph_c0	3.32072	8.72741	3.77035
c15882.graph_c0	51.5428	142.564	98.6968
c15883.graph_c0	5.11797	17.7552	18.9631
c15884.graph_c0	1.56205	5.5498	0.295592
c15895.graph_c0	0.89359	3.86472	3.66544
c15897.graph_c0	1.31775	4.58563	7.26894
c15899.graph_c0	0.0904818	2.61582	1.13007
c15901.graph_c0	99.7365	51.101	122.248
c15908.graph_c0	17.2014	40.8743	21.1221
c15943.graph_c0	1.02588	5.64918	17.6938
c15944.graph_c0	7.01993	18.1649	13.5739
c15959.graph_c0	4.02761	9.84798	4.56728
c15962.graph_c0	4.46895	6.83581	0.442973
c15969.graph_c0	4.26338	1.2901	5.20897
c15979.graph_c0	0	3.90444	7.49557
c15980.graph_c0	0.39932	8.12376	3.94826
c15981.graph_c0	7.51264	28.2233	22.9735
c15984.graph_c0	227.284	69.7232	184.722
c15987.graph_c0	9.55604	3.78963	0
c15989.graph_c0	3.22182	7.80727	18.3545
c15991.graph_c0	0	16.5985	0
c15992.graph_c0	7.25862	3.11424	0.658072
c16007.graph_c0	1.30323	119.076	0.30142
c16024.graph_c0	0	1.5944	4.99381
c16025.graph_c0	8.77957	0.0895296	0.0870253
c16040.graph_c0	0.956043	75.1001	4.70381
c16042.graph_c0	5.22574	33.3059	37.5542
c16052.graph_c0	1.99555	26.868	30.1819
c16056.graph_c0	0.17339	2.28974	6.01539
c16058.graph_c0	7.40258	0.505928	0
c16074.graph_c0	70.0236	1.26139	0
c16075.graph_c0	16.7689	62.5963	30.3073
c16076.graph_c0	7.92513	34.8467	31.1388
c16077.graph_c0	48.0859	124.045	146.991
c16079.graph_c0	0	6.72655	15.6922
c16090.graph_c0	48.7424	124.346	103.248
c16091.graph_c0	8.85182	55.8873	30.18
c16102.graph_c0	20.0586	17.7714	43.5404
c16107.graph_c0	39.3492	104.619	43.9373
c16114.graph_c0	4.30204	3.50483	8.95501
c16120.graph_c0	12.5804	0.683276	0.189761
c16121.graph_c0	127.188	72.8098	229.987
c16125.graph_c0	55.2245	170.997	91.8167
c16126.graph_c0	0	7.08853	7.12515
c16131.graph_c0	22.8018	27.5135	8.12357
c16137.graph_c0	40.0074	132.43	112.143
c16139.graph_c0	68.3574	22.4894	149.346
c16143.graph_c0	60.7909	32.1374	100.856
c16150.graph_c0	11.7384	34.913	17.0727
c16156.graph_c0	4.85126	18.8074	28.3796
c16160.graph_c0	0.273408	3.37991	3.69927
c16161.graph_c0	8.74877	0	0
c16167.graph_c0	25.4697	75.1832	13.9299
c16172.graph_c0	2.56118	7.87321	0.429943
c16179.graph_c0	45.0184	121.868	123.752
c16184.graph_c0	47.7646	94.8877	155.699
c16188.graph_c0	10.2485	46.0505	20.2663
c16190.graph_c0	1.52898	7.89333	4.14886
c16192.graph_c0	68.4474	161.501	155.89
c16199.graph_c0	8.91775	1.59143	0
c16200.graph_c0	8.64954	11.813	2.23527
c16204.graph_c0	28.8574	2.49358	0.105384
c16207.graph_c1	32.4111	28.8517	8.77733
c16229.graph_c0	9.03253	1.9957	0
c16235.graph_c0	5.52857	29.9864	13.7249
c16236.graph_c0	7.33617	21.0848	16.3156
c16247.graph_c0	0.560083	5.87707	0.233171
c16257.graph_c0	2.78994	11.9492	8.37616
c16264.graph_c0	0	41.9312	0
c16270.graph_c0	20.6433	2.09796	2.25777
c16276.graph_c0	118.512	244.021	405.121
c16291.graph_c0	14.9436	42.3473	35.7285
c16297.graph_c0	10.1201	44.1103	26.3152
c16299.graph_c0	5.99064	4.53701	12.9262
c16317.graph_c0	10.858	27.1744	14.1809
c16322.graph_c0	88.7892	21.1374	0.094683
c16327.graph_c0	10.3553	0	0.0898137
c16330.graph_c0	88.764	206.682	268.089
c16344.graph_c0	2.50444	12.2098	27.896
c16355.graph_c0	33.6708	12.8489	33.2809
c16359.graph_c0	4.78328	17.256	20.2964
c16360.graph_c0	4.25219	16.3371	16.4008
c16364.graph_c0	12.5167	0.366179	0.0711872
c16367.graph_c1	15.7215	12.803	41.8669
c16370.graph_c0	2.31506	2.77628	11.2764
c16370.graph_c1	3.50672	4.06767	13.3824
c16375.graph_c0	0.580652	2.33147	0.392817
c16377.graph_c0	9.06027	1.99873	1.42158
c16382.graph_c0	3.37071	2.0227	5.1659
c16392.graph_c0	5.44663	26.5086	13.6566
c16401.graph_c0	71.8029	1784.4	553.937
c16412.graph_c0	8.93876	0.820376	0
c16420.graph_c0	13.2824	3.04757	0
c16422.graph_c0	5.10092	0.461556	0.373871
c16442.graph_c0	59.4131	162.185	29.7512
c16453.graph_c0	5.62009	6.22514	1.14297
c16454.graph_c1	8.46292	6.47254	18.7172
c16454.graph_c2	1543.45	1138.94	2694.17
c16454.graph_c3	53.7446	2.13566	1.24555
c16455.graph_c0	6.4495	1.1581	1.41756
c16474.graph_c0	2.10786	0.173612	5.6252
c16490.graph_c0	109.736	303.526	295.099
c16499.graph_c0	12.8372	31.7354	7.07336
c16503.graph_c0	10.6284	33.0393	1.42734
c1651.graph_c0	2.09427	0	0
c16528.graph_c0	1.42841	6.50017	3.64235
c16530.graph_c0	7.00926	3.37253	0.369374
c16531.graph_c0	13.3427	11.753	29.6893
c16560.graph_c0	5.84626	4.98466	0.563399
c16565.graph_c0	15.4971	1.80363	1.92849
c16567.graph_c0	5.87876	0	7.8064
c16580.graph_c0	3.20618	4.69407	9.87464
c16597.graph_c0	20.7079	0	0.691523
c16602.graph_c0	6.90538	1.46051	7.36448
c16612.graph_c0	14.2511	45.4085	29.5342
c16639.graph_c0	111.261	85.3078	210.505
c16653.graph_c0	2.15221	29.6058	34.4399
c16654.graph_c0	261.231	263.875	24.4735
c16657.graph_c0	5.5917	1.12512	3.86683
c16659.graph_c0	4.43704	9.50181	2.18748
c16660.graph_c0	86.7895	283.306	100.445
c16661.graph_c0	0.259501	10.5586	3.24103
c16664.graph_c0	7.83542	4.77893	0.722595
c16674.graph_c0	5.97513	3.56332	0.262398
c16691.graph_c0	12.524	30.758	17.2742
c16699.graph_c0	2.01257	3.26506	5.6175
c16701.graph_c0	4.07013	53.5033	18.9323
c16709.graph_c0	13.456	35.5121	31.7573
c16711.graph_c0	138.616	355.698	314.762
c16713.graph_c0	2.12923	5.80817	2.84923
c16714.graph_c0	8.32529	1.11987	2.96085
c16715.graph_c0	14.6229	2.91115	4.89465
c16717.graph_c0	21.5188	52.9389	45.2484
c16721.graph_c0	0.844597	52.9685	0.376734
c16723.graph_c0	10.9381	0.679706	0.20329
c16728.graph_c0	69.0665	190.387	192.292
c16738.graph_c0	14.1337	1.53795	10.2852
c16747.graph_c0	11.4304	8.26609	2.05543
c16757.graph_c0	2.03004	13.4766	0.211284
c16759.graph_c0	6.53881	2.60227	6.98618
c16763.graph_c0	2.85236	7.23941	2.41894
c16769.graph_c0	6.22718	4.01063	0.41421
c16772.graph_c0	1.02741	7.4806	0.356439
c16774.graph_c0	49.1341	333.551	246.143
c16776.graph_c0	41.281	174.22	126.884
c16778.graph_c0	93.7953	241.221	236.453
c16793.graph_c0	0	9.9458	0.557746
c16799.graph_c0	2.92227	13.1669	5.18476
c16800.graph_c0	10.2987	51.0211	25.1969
c16806.graph_c0	19.0691	35.607	2.33967
c16806.graph_c1	11.4401	22.6536	1.29529
c16816.graph_c0	5.58248	0.216049	5.74017
c16818.graph_c0	0	9.61028	4.50272
c16824.graph_c0	0	12.7113	0
c16825.graph_c0	1.72582	2.02389	7.82634
c16839.graph_c0	1.39762	6.4135	4.36387
c16850.graph_c0	59.23	0	0.237099
c16862.graph_c0	22.299	52.8787	33.9823
c16869.graph_c0	5.9623	0.567471	1.65479
c16873.graph_c0	36.3738	0	16.1484
c16875.graph_c0	12.4199	1.13641	1.41016
c16875.graph_c1	9.16245	0.721365	1.1219
c16877.graph_c0	0	0	9.88063
c16890.graph_c0	14.9675	35.4318	13.8858
c16899.graph_c0	7.68927	21.1943	27.2574
c16904.graph_c0	7.64287	2.37341	0.904351
c16907.graph_c0	20.1497	1.22258	0.27962
c16910.graph_c1	53.6948	107.093	21.9663
c16911.graph_c0	2.00097	43.4481	6.73207
c16928.graph_c0	11.109	0.692289	0.061175
c16930.graph_c0	5.73676	1.55215	0.256806
c16935.graph_c0	0.464952	58.2474	6.61351
c16937.graph_c0	3.25762	8.89453	8.39145
c16946.graph_c0	4.49576	13.8396	12.4777
c16953.graph_c0	1.9796	7.20674	0.309051
c16954.graph_c0	6.7595	3.19803	0
c16961.graph_c0	0.630814	10.1991	5.97454
c16967.graph_c0	3.21311	2.92198	7.55872
c16968.graph_c0	5.77783	2.55642	7.70323
c16982.graph_c0	1.20311	2.4844	4.82982
c16992.graph_c0	8.94218	1.47798	1.68649
c16993.graph_c0	27.701	2.72471	0
c16997.graph_c0	0.625654	2.29684	3.34888
c17001.graph_c0	11.5335	12.8167	3.612
c17013.graph_c0	9.12118	3.51309	0
c17016.graph_c0	8.64929	8.86534	42.3943
c17021.graph_c0	7.55407	41.1454	45.4639
c17029.graph_c0	13.1959	1.9624	6.58092
c17033.graph_c0	8.93578	6.87147	17.6705
c17049.graph_c0	7.82717	0.380947	3.94977
c17050.graph_c0	6.4208	15.6666	7.2092
c17053.graph_c0	10.7455	11.5056	28.2498
c17062.graph_c0	16.2667	14.077	31.9122
c17081.graph_c0	0.680786	16.4741	5.95185
c17082.graph_c0	18.6741	49.9877	42.2615
c17086.graph_c0	683.63	14.3821	2.15904
c17114.graph_c0	11.618	0	0
c17116.graph_c0	0.8625	5.96984	1.53888
c17120.graph_c0	1.47184	11.557	13.7868
c17123.graph_c0	30.7068	80.2948	12.2538
c17123.graph_c1	27.3485	79.2583	13.8506
c17124.graph_c0	26.0981	20.6372	5.64649
c17128.graph_c0	2.93879	19.3857	2.07551
c17137.graph_c0	1.43295	5.83041	7.69562
c17153.graph_c0	3.10465	3.21817	0.65313
c17170.graph_c0	3.49203	8.3911	5.21924
c17181.graph_c0	3.49974	10.6021	10.809
c17197.graph_c0	20.8562	4.3793	2.08611
c17202.graph_c0	12.5251	47.8211	40.9604
c17214.graph_c0	31.947	75.3757	40.5736
c17218.graph_c0	6.47072	17.636	26.9385
c17221.graph_c0	0	11.2385	0
c17226.graph_c0	5.50513	8.6079	40.6533
c17230.graph_c0	2.42794	6.25329	1.09274
c17233.graph_c0	18.2475	2.74221	7.66332
c17240.graph_c0	3.49446	11.6331	2.38058
c17260.graph_c0	77.2723	22.1009	7.62484
c17263.graph_c0	2.53228	0	7.54316
c17264.graph_c0	24.1008	5.76508	8.77932
c17270.graph_c0	0.483887	7.25362	1.59481
c17273.graph_c0	0	6.44713	2.12779
c17279.graph_c0	93.34	5.32303	1.42553
c17284.graph_c0	47.047	5.63719	1.16585
c17291.graph_c0	5.32647	1.20068	4.47388
c17297.graph_c0	8.78856	38.2093	19.5832
c17301.graph_c0	1.02821	156.792	1.07015
c17301.graph_c1	0.41213	50.9681	0.643408
c17304.graph_c0	11.748	3.86089	13.801
c17327.graph_c0	67.1238	15.8799	19.8459
c17328.graph_c0	14.4786	105.644	29.9738
c17332.graph_c0	0	21.4874	3.94704
c17333.graph_c0	0	7.24541	8.03313
c17335.graph_c0	11.5427	1.43455	4.07602
c17351.graph_c0	4.54429	10.4757	5.17478
c17370.graph_c0	0.661658	1.41692	6.42735
c17371.graph_c0	6.33529	22.2407	18.9163
c17375.graph_c0	7.4087	1.32683	1.04275
c17380.graph_c0	6.61904	1.18121	1.82663
c17382.graph_c0	2.42608	26.4492	10.3297
c17390.graph_c0	0	9.02344	0
c17400.graph_c0	9.84729	23.9857	19.8386
c17402.graph_c0	17.2685	10.6762	32.0352
c17404.graph_c0	13.6383	154.975	248.425
c17421.graph_c0	23.6848	6.96707	25.644
c17443.graph_c0	1.89305	4.1806	8.12732
c17453.graph_c0	1.80536	9.02095	2.88112
c17455.graph_c0	14.2091	3.00527	2.49519
c17458.graph_c0	3.86634	10.4071	4.41526
c17462.graph_c0	7.23595	2.05801	0
c17463.graph_c0	2.27034	0	8.27029
c17473.graph_c0	8.1666	3.5772	0.515133
c17484.graph_c0	6.23161	0.290105	0.28199
c17486.graph_c0	64.2908	13.7388	16.8688
c17487.graph_c0	0	3.51515	6.17657
c17492.graph_c0	10.9561	2.30696	1.66989
c17495.graph_c1	2.71177	8.38816	5.95835
c17497.graph_c0	0.102362	11.5083	1.91767
c17499.graph_c0	2.06643	8.69603	5.7519
c17502.graph_c0	6.77257	0	2.78674
c17503.graph_c0	20.6956	4.81322	5.89381
c17504.graph_c0	16.599	7.93184	0
c17506.graph_c0	26.769	38.7123	8.32356
c17515.graph_c0	4.47095	11.1426	9.5473
c17518.graph_c0	4.14589	3.04722	7.49638
c17525.graph_c0	10.0351	12.894	0.696295
c17527.graph_c0	7.24959	5.97108	0.193469
c17531.graph_c0	56.7005	4.01812	4.08881
c17536.graph_c0	0	19.6163	0.932657
c17539.graph_c0	6.39858	1.91196	10.0668
c17540.graph_c0	0.711272	12.3377	11.9926
c17542.graph_c0	0	5.60289	11.2224
c17545.graph_c0	2.68401	1.54747	24.067
c17551.graph_c0	4.26234	7.00207	11.7286
c17561.graph_c0	0.447953	0.959279	8.74168
c17573.graph_c0	1.64355	4.62765	5.22679
c17576.graph_c0	1.84004	3.7086	20.559
c17592.graph_c0	8.27017	3.86264	0.945035
c17600.graph_c0	43.4674	54.2767	133.563
c17615.graph_c0	12.7105	0.772175	0.562932
c17617.graph_c0	12.8472	3.21151	1.3007
c17625.graph_c0	2.33658	9.62027	17.3417
c17646.graph_c0	0	13.426	2.49204
c17655.graph_c0	48.1904	0.655068	0
c17656.graph_c0	7.37098	21.7585	8.265
c17664.graph_c0	10.7563	26.8734	53.9848
c17666.graph_c0	0.625911	6.8359	1.8566
c17671.graph_c0	15.6973	6.73971	15.4479
c17672.graph_c0	22.741	62.8975	32.4692
c17701.graph_c0	13.9991	54.4611	51.7457
c17718.graph_c0	23.2196	0.10025	0.0974461
c17721.graph_c0	3.9963	10.6975	6.11661
c17729.graph_c1	1.53977	2.00198	6.18135
c17733.graph_c0	4.64476	5.39163	0.90359
c17744.graph_c0	55.5928	33.4667	74.852
c17762.graph_c0	1.92524	10.5132	6.41203
c17764.graph_c0	0.95274	2.89933	3.23575
c17765.graph_c0	6.83796	12.469	23.6366
c17766.graph_c0	3.1029	2.77692	16.9667
c17770.graph_c0	2.04998	5.36552	9.00849
c17776.graph_c0	20.8732	57.0157	46.9065
c17778.graph_c0	1.45365	7.00415	0.75647
c17789.graph_c0	2.71904	1.77917	10.7957
c17791.graph_c0	97.9913	432.623	215.387
c17792.graph_c0	3.49618	16.5337	18.952
c17793.graph_c0	10.6497	0	4.43363
c17803.graph_c0	28.953	22.5904	48.7142
c17804.graph_c0	1.93354	4.14063	30.0031
c17810.graph_c0	4.5972	0	8.50613
c17821.graph_c0	26.4386	65.0951	52.6796
c17824.graph_c0	1.63565	10.5957	5.10709
c17824.graph_c1	1.22535	8.397	2.55066
c17829.graph_c0	3.44287	7.92303	8.14264
c17831.graph_c0	22.4794	82.906	71.5835
c17844.graph_c0	8.85241	22.0752	22.3669
c17846.graph_c0	13.3013	87.4174	24.5847
c17857.graph_c0	5.67614	3.50824	11.7192
c17860.graph_c0	10.256	0.445193	0
c17861.graph_c0	16.4155	41.6867	38.2726
c17875.graph_c0	5.87573	11.0099	19.0063
c17878.graph_c0	49.601	117.364	79.8226
c17881.graph_c0	9.66138	4.75957	1.13301
c17882.graph_c0	0.869541	7.88654	14.6931
c17884.graph_c0	13.0746	43.5652	17.095
c17898.graph_c0	1.97687	5.97658	4.29654
c17899.graph_c0	65.9121	31.3285	84.5358
c17903.graph_c0	0	10.1699	0
c17908.graph_c0	19.6692	8.34474	18.0436
c17932.graph_c0	2.5588	2.27203	5.84598
c17933.graph_c0	10.4005	0.435936	0.423743
c17936.graph_c0	5.33521	0.718682	0.788141
c17938.graph_c0	0.882173	2.47043	1.16535
c17976.graph_c0	3.24075	0	1.19685
c17988.graph_c0	4.02004	0.0915831	0
c18024.graph_c0	3.22378	0.220329	0.428332
c18052.graph_c0	0	3.1305	2.07473
c18122.graph_c0	1.6441	2.31053	0
c18122.graph_c1	3.52931	7.28409	1.81001
c18146.graph_c0	1.48334	0	1.70354
c18157.graph_c0	0.356199	4.831	0
c18158.graph_c0	0.406009	4.99938	0.422568
c18161.graph_c0	0.271108	4.52846	1.63656
c18174.graph_c0	0.0858357	1.2867	4.28816
c18205.graph_c0	0	2.92222	2.0658
c18215.graph_c0	1.1646	2.49397	0.173158
c18219.graph_c0	1.87467	0	0
c18234.graph_c0	0	3.4799	2.35309
c18261.graph_c0	0.302625	4.05039	0.157484
c18280.graph_c0	3.45177	0.652224	0.169061
c18299.graph_c0	3.59301	0	1.33556
c18313.graph_c0	2.91381	4.23418	0.288824
c18320.graph_c0	3.05137	0.105394	1.4001
c18348.graph_c0	0.368804	2.43517	1.91923
c18374.graph_c0	2.68264	0	0.446729
c18374.graph_c1	3.34689	0	0.596257
c18415.graph_c0	2.6985	0	0.320979
c18420.graph_c0	0.119585	1.1524	2.86264
c18457.graph_c0	7.78289	0	2.63088
c18476.graph_c0	0.102665	1.48402	2.32404
c18487.graph_c0	11.84	1.56512	0.304269
c18557.graph_c0	0.330701	6.37368	0.11473
c18588.graph_c0	6.56763	1.11622	0
c18623.graph_c0	1.87357	0	2.55936
c18641.graph_c0	6.95205	2.31585	0.160791
c18645.graph_c0	0	2.79753	3.02142
c18657.graph_c0	2.8079	1.4683	0.135927
c18657.graph_c1	2.27115	0.788694	0
c18691.graph_c0	0.0633891	2.44343	0.593771
c18709.graph_c0	0	2.99032	0.792731
c18718.graph_c0	1.3371	0.613577	5.76534
c18721.graph_c1	0.825552	0.220987	2.47027
c18727.graph_c0	0.551095	3.20328	0.491633
c18751.graph_c0	3.13445	0.671234	3.40729
c18762.graph_c0	0.520033	2.92329	0.0676554
c18766.graph_c0	0	2.13591	1.82451
c18825.graph_c0	2.28906	0	1.3793
c18847.graph_c0	1.1284	3.51138	1.13772
c18852.graph_c0	3.1895	0.0776161	0.0754451
c18877.graph_c0	3.32954	0.0636617	1.48514
c18898.graph_c0	1.01451	0.506928	2.53414
c18923.graph_c0	3.07538	0.759905	0
c18934.graph_c0	0.184894	0.544426	3.41573
c18943.graph_c0	0	5.06088	0.117127
c18959.graph_c0	12.1308	5.14654	0.238218
c18974.graph_c0	0.0954506	2.81057	1.83786
c18981.graph_c0	0.111758	0.119664	2.55897
c18982.graph_c0	2.37179	2.97183	0.472697
c18985.graph_c0	2.65581	1.91437	0.415523
c19005.graph_c0	2.64403	3.33065	0.687967
c19042.graph_c0	5.34764	0.313749	0.304973
c19054.graph_c0	2.65439	0	2.69688
c19091.graph_c0	5.00547	0	4.36155
c19094.graph_c0	0	4.17703	0.47767
c19112.graph_c0	12.8288	0	11.5598
c19115.graph_c0	0.106631	0.456693	2.44155
c19121.graph_c0	8.59861	1.00211	0.182639
c19133.graph_c0	8.4193	0	0.691792
c19190.graph_c0	0	3.086	4.7495
c19200.graph_c0	2.06342	3.5835	7.72603
c19227.graph_c0	0.187196	9.35374	0.584492
c19234.graph_c0	3.17313	0	0.117948
c19283.graph_c1	0.854847	3.0002	2.22428
c19301.graph_c0	15.3529	4.55535	17.5192
c19302.graph_c0	10.4746	1.67189	0.947989
c19318.graph_c0	0.627966	0	3.59468
c19323.graph_c0	0	3.47658	0.750962
c19331.graph_c0	0.146198	2.03502	0.0507204
c19350.graph_c0	1.98646	0	2.06748
c19351.graph_c0	0.749202	0.145854	1.70129
c19360.graph_c0	13.5642	12.2893	3.15915
c19375.graph_c0	2.73691	1.05056	0.0537461
c19423.graph_c0	0.230362	1.7266	1.01897
c19433.graph_c0	0.0813708	1.13265	2.03255
c19440.graph_c0	2.85875	1.999	0.344088
c19469.graph_c1	0	2.75415	2.42215
c19477.graph_c0	4.2494	0	1.44353
c19477.graph_c1	4.63993	0	1.75606
c19559.graph_c0	0.127983	0	3.46328
c19578.graph_c0	2.79745	0.578047	0.10216
c19594.graph_c0	1.39659	1.54211	0.136271
c19601.graph_c0	0.388667	4.88988	0.707909
c19617.graph_c0	2.21517	0	0.4117
c19626.graph_c0	2.83638	11.7562	4.0948
c19627.graph_c0	1.72741	1.09722	0.0609444
c19689.graph_c0	0.0973892	2.60696	2.6354
c19717.graph_c0	2.019	0.123533	1.32085
c19734.graph_c0	0.156992	1.51287	3.26789
c19794.graph_c0	1.44921	1.38715	0.251387
c19815.graph_c0	0.151308	2.18714	3.22832
c19847.graph_c0	0.367457	3.6722	0.382445
c19855.graph_c0	3.37159	0	1.79954
c19857.graph_c0	0	0.853544	2.98681
c19861.graph_c0	0	3.20801	0.682123
c19865.graph_c0	0	0	3.54546
c19881.graph_c0	0	2.87452	1.39706
c19890.graph_c0	11.1912	2.63358	7.39176
c19932.graph_c1	5.97879	1.66767	0.287601
c19934.graph_c0	0	2.70361	0
c19935.graph_c0	4.02015	0.659563	0.506143
c19977.graph_c0	0.620075	2.98771	1.45207
c20008.graph_c0	2.25856	0.936125	0.0379142
c20016.graph_c0	0	0.395448	5.50955
c20028.graph_c0	0	0	3.69098
c20028.graph_c1	1.2201	0	4.298
c20074.graph_c0	2.92363	0.130435	1.8384
c20227.graph_c0	0	4.0414	0.436484
c20239.graph_c0	0.676917	3.02	1.46776
c20254.graph_c0	0.350634	4.1298	0
c20276.graph_c0	4.72162	0	1.16608
c20306.graph_c0	0.0967208	2.07125	2.81864
c20307.graph_c0	4.79727	0	2.60742
c20309.graph_c0	0	9.49325	13.3375
c20314.graph_c0	0.253468	2.35211	0.351741
c20328.graph_c0	2.45233	0	0
c20330.graph_c0	3.53073	0	0
c20352.graph_c0	0.405543	2.17115	0.241191
c20409.graph_c0	2.09593	1.42132	0.0363569
c20421.graph_c0	0	2.02303	0.873976
c20469.graph_c0	6.76624	0	0
c20488.graph_c0	2.53576	0	0.164949
c20502.graph_c0	2.49263	0.553933	0.097898
c20516.graph_c0	2.32593	8.18295	0.172914
c20521.graph_c0	0.116317	1.1209	2.66335
c20533.graph_c0	0	3.02469	0.070002
c20552.graph_c0	0.0774697	2.23964	0.161259
c20556.graph_c0	10.7377	2.37873	0.128455
c20557.graph_c0	3.95812	14.1976	7.29161
c20568.graph_c1	1.9259	3.28066	0
c20579.graph_c0	0.111501	3.22349	0.116049
c20593.graph_c0	12.6693	4.3976	10.288
c20606.graph_c0	0.0724842	2.17312	1.65969
c20622.graph_c0	3.50659	1.1184	0
c20667.graph_c0	2.18153	0	0
c20685.graph_c0	4.60639	0	0
c20706.graph_c0	2.76792	0.49702	0.393651
c20712.graph_c0	3.96427	0	0
c20726.graph_c0	3.31336	0	0
c20741.graph_c0	0	3.46012	2.05221
c20749.graph_c0	2.36955	0.0939689	0.0456702
c20764.graph_c0	4.16816	0.314296	0.0611009
c20796.graph_c0	6.66747	0	6.42917
c20823.graph_c0	2.36213	0	1.29753
c20860.graph_c0	4.16904	0.273303	0.442763
c20916.graph_c0	3.10656	2.04696	6.46653
c20979.graph_c0	0.818461	1.82574	0.0709869
c21004.graph_c0	2.41986	1.15915	0
c21060.graph_c0	5.94126	1.6193	0
c21071.graph_c0	3.65797	0.460791	0.335926
c21082.graph_c0	1.73995	2.40124	0.201213
c21093.graph_c0	0	3.4398	8.23036
c21103.graph_c0	0.933495	3.05411	3.6164
c21105.graph_c0	4.01683	0.614424	0
c21108.graph_c0	4.85932	2.21407	0.269017
c21111.graph_c0	5.06415	0.120497	1.40552
c21114.graph_c0	0	3.06046	5.71171
c21117.graph_c0	6.40502	0	0
c21140.graph_c0	1.05466	0.941052	8.41551
c21147.graph_c0	5.59219	0.488797	0.118781
c21149.graph_c0	5.80791	1.23202	0.171079
c21151.graph_c0	0.111758	4.06857	2.67528
c21154.graph_c0	0.979435	4.68427	0
c21167.graph_c0	4.74725	0	0.836148
c21178.graph_c0	11.4725	5.34717	22.8975
c21209.graph_c0	4.695	0.670281	0.814415
c21239.graph_c0	0	2.38282	6.10627
c21279.graph_c0	6.01246	0.107296	0.208589
c21290.graph_c0	24.7758	33.293	6.94644
c21292.graph_c0	0.492012	5.09255	1.02416
c21294.graph_c0	0.148487	1.90789	1.62271
c21302.graph_c0	3.12669	1.53207	0.0551562
c21304.graph_c0	0.145238	5.59841	0.302323
c21330.graph_c0	0.771975	0.551054	3.61557
c21347.graph_c0	5.71914	1.64869	0
c21350.graph_c0	1.89082	5.60131	0.524784
c21383.graph_c0	5.43176	0.280288	0.476784
c21391.graph_c0	4.8456	3.69122	0.451633
c21396.graph_c0	0.713306	4.20069	2.35093
c21419.graph_c0	0	3.56851	0
c21444.graph_c0	10.437	25.5983	21.6508
c21471.graph_c0	4.4819	0.111603	0.650888
c21504.graph_c0	3.82086	1.67365	0.120506
c21527.graph_c0	0.464952	3.81678	0.967831
c21529.graph_c0	5.09391	0.829993	0.115254
c21625.graph_c0	0	3.53461	3.38446
c21633.graph_c0	0	0	18.1069
c21634.graph_c0	0.418053	2.76035	0.217552
c21670.graph_c0	0.122796	4.33891	2.55609
c21671.graph_c0	4.41692	0.831536	1.41448
c21673.graph_c0	6.9365	19.3931	22.2599
c21682.graph_c0	3.97131	0	1.03332
c21692.graph_c0	1.72938	5.16936	0.674969
c21701.graph_c0	3.24739	0	0.74471
c21713.graph_c0	4.23175	0	2.37157
c21723.graph_c0	0.204615	2.40998	0.0709869
c21803.graph_c0	1.80747	1.07518	5.12103
c21811.graph_c0	0.143518	0.614679	3.73428
c21858.graph_c0	5.07909	9.12242	1.61998
c21858.graph_c1	5.83125	8.53663	1.8173
c21881.graph_c0	3.77797	0	1.14157
c21933.graph_c0	1.65025	0	1.41446
c21956.graph_c0	0.634127	2.03695	7.75489
c21974.graph_c1	4.41909	0	0
c21981.graph_c0	7.53863	0	1.91661
c21996.graph_c0	1.43757	1.39933	0.0680092
c22000.graph_c0	0	4.57841	0.460381
c22019.graph_c0	0.0617736	1.65358	0.0642931
c22035.graph_c0	3.1862	2.97008	0
c22142.graph_c0	0.549918	6.59475	0.343408
c22154.graph_c0	3.11866	36.9283	22.0846
c22167.graph_c0	4.79984	0.41954	2.95659
c22177.graph_c0	5.87783	1.77008	0.0637247
c22207.graph_c0	4.99286	2.49869	0
c22212.graph_c0	0	0	2.54963
c22226.graph_c0	1.91872	0	0
c22283.graph_c0	0	0	8.92371
c22295.graph_c0	4.75236	0	0.0665406
c22297.graph_c0	2.63464	6.11219	13.025
c22309.graph_c0	5.16019	1.24317	0
c22334.graph_c0	2.08853	0.698834	2.853
c22358.graph_c0	0	5.64013	1.92117
c22368.graph_c0	0	0	3.52255
c22384.graph_c0	1.09523	2.77444	2.50221
c22394.graph_c0	7.8683	0	0.227478
c22410.graph_c0	1.87047	3.45935	0
c22418.graph_c0	1.03714	2.81592	3.19977
c22431.graph_c0	2.8086	3.93258	0.112429
c22462.graph_c0	4.25261	0	0
c22498.graph_c0	3.42528	0.130985	0
c22537.graph_c0	0	4.03649	0
c22561.graph_c0	8.11981	1.73884	0.11268
c22570.graph_c0	3.75894	0.649167	1.00961
c22588.graph_c0	2.65135	0.384935	0.280626
c22599.graph_c1	0.649425	13.2699	0.168978
c22625.graph_c0	0.153804	2.71728	0.240115
c22629.graph_c0	5.90335	0	0
c22639.graph_c0	2.9877	0	0.725564
c22644.graph_c0	5.6294	0	2.24021
c22657.graph_c0	0.191419	1.63967	0.132817
c22658.graph_c0	9.02954	0.897054	0.290654
c22660.graph_c0	1.47936	4.97829	4.39912
c22671.graph_c0	0.090724	2.71996	0.283273
c22692.graph_c0	3.08149	0.0999837	0.194374
c22699.graph_c0	8.04286	2.3848	0
c22752.graph_c0	11.5292	1.77456	0.524976
c22806.graph_c0	2.03039	2.0752	0
c22820.graph_c0	0.0765623	6.47626	2.31086
c22927.graph_c0	0	4.93223	0
c22930.graph_c0	0.221561	4.74466	1.38358
c23.graph_c0	0.0721648	1.7772	0
c23000.graph_c0	8.42184	19.7446	19.8155
c23002.graph_c0	1.77437	4.06183	0.477606
c23008.graph_c0	0	4.39886	0.13574
c23024.graph_c0	4.21633	1.60793	0.240455
c23033.graph_c0	0	0.174893	4.93004
c23042.graph_c0	2.53423	0.370021	2.87737
c23054.graph_c0	0.344361	0.36872	5.01769
c23086.graph_c0	4.74303	0	0.37973
c23095.graph_c0	0.63289	3.38829	1.77343
c23103.graph_c0	3.64782	0	0.967762
c23120.graph_c0	0.335618	0.449197	3.14376
c23137.graph_c0	7.36185	1.30171	0.632652
c23148.graph_c0	1.82932	21.44	1.18352
c23170.graph_c0	1.10735	5.33555	5.76256
c23176.graph_c0	0.498475	1.52496	3.11284
c23182.graph_c0	1.07458	5.09549	0
c23209.graph_c0	0	5.55834	2.52134
c23221.graph_c0	0	0.256868	2.99619
c23300.graph_c0	0.0505626	3.84389	0.841999
c23312.graph_c0	3.36934	1.67312	0.0508226
c23314.graph_c0	2.29201	0.951605	0.170392
c23345.graph_c0	0.887926	6.06094	0.462071
c23355.graph_c0	4.28513	0	1.83643
c23375.graph_c1	6.93338	1.45565	1.13195
c23392.graph_c0	1.50557	1.28017	0.0460874
c23399.graph_c1	0.349532	2.90049	0.636629
c23476.graph_c0	3.5763	0.0765855	0.669989
c23561.graph_c0	0.426013	2.05266	6.20744
c23620.graph_c0	9.46605	0	0
c23632.graph_c0	0	3.36431	2.68624
c23655.graph_c0	8.27359	7.31009	19.9318
c23667.graph_c0	7.24734	2.9488	0
c23742.graph_c0	5.04232	0.555779	1.46635
c23758.graph_c0	0.0944353	4.34796	1.96574
c23772.graph_c0	3.55557	0.722511	0.459197
c23776.graph_c0	0.178301	3.72282	0.556721
c23784.graph_c0	2.32729	0	4.35998
c23802.graph_c0	0.247947	3.9823	1.16127
c23860.graph_c0	3.67389	0.437086	0
c23860.graph_c1	2.75153	0.597195	0.193497
c23865.graph_c0	0.226968	0.972094	1.73232
c23905.graph_c0	2.04077	0.376746	0.0732416
c23906.graph_c0	0.45821	5.76481	1.31147
c23911.graph_c0	12.9719	7.20679	23.1172
c23931.graph_c1	0.319056	0.683251	2.24147
c23936.graph_c0	0.300445	2.63792	0.875558
c23965.graph_c0	4.54417	2.68698	0.211769
c23970.graph_c0	2.40799	0.278738	2.37074
c24028.graph_c0	17.1105	41.6856	17.239
c24030.graph_c0	0	2.77042	0.307763
c24032.graph_c1	3.09536	0.147303	0
c24044.graph_c0	11.937	1.16195	2.033
c24047.graph_c0	0.258698	2.90847	0.807748
c24059.graph_c0	3.23151	0	4.20413
c24069.graph_c0	0.185794	1.39256	1.28915
c24099.graph_c0	0	0	4.79739
c24117.graph_c0	2.10955	3.24243	0.424953
c24168.graph_c0	0	3.20256	1.48882
c24173.graph_c0	0.206265	2.65027	1.9321
c24177.graph_c0	4.13132	0	0
c24178.graph_c0	4.98765	3.73832	0
c24180.graph_c0	3.68671	0	0
c24189.graph_c0	3.46125	0.247072	0
c24193.graph_c0	3.05837	0.918516	0.155274
c24199.graph_c0	24.4933	0.645958	0
c24209.graph_c0	0.25255	2.54189	0.473131
c24214.graph_c0	2.55635	0	0
c24227.graph_c0	7.47023	6.25981	21.8599
c24229.graph_c0	0.156738	4.36345	0
c24249.graph_c0	1.99836	7.63164	9.56736
c24268.graph_c0	3.94456	0.474076	1.17298
c24274.graph_c0	8.66064	2.84668	0.8385
c24280.graph_c0	2.62746	0.160761	0.234397
c24302.graph_c0	6.27308	3.35841	8.78661
c24325.graph_c0	7.77984	16.034	3.50065
c24329.graph_c0	0	2.22337	0.127128
c24346.graph_c0	13.6887	9.87465	24.7493
c24364.graph_c0	0.508394	0.326614	3.06895
c24371.graph_c0	1.98823	0.118271	0.344887
c24375.graph_c0	2.12697	0.26278	0.681145
c24415.graph_c0	16.5093	4.5673	1.80871
c24419.graph_c0	2.87376	0	0.0747742
c24420.graph_c0	0.073813	0.316137	1.76694
c24426.graph_c0	2.10125	0.288447	0
c24460.graph_c0	2.90986	0.094415	0.275322
c24461.graph_c0	5.98534	3.06801	0
c24462.graph_c0	0	1.58074	0.886455
c24500.graph_c0	2.83948	9.60107	9.64359
c24508.graph_c0	2.81152	0.460775	0.0298591
c24515.graph_c0	2.33943	13.6807	4.12051
c24519.graph_c0	0.136257	3.0638	0
c24519.graph_c1	0.527473	7.6246	0.548987
c24521.graph_c0	19.2487	4.03245	2.96152
c24527.graph_c0	1.26243	3.11938	5.35677
c24534.graph_c0	1.49045	7.97938	13.6791
c24555.graph_c0	9.89796	4.87634	0.586989
c24557.graph_c0	4.09491	10.6579	7.27806
c24576.graph_c0	1.01647	18.1183	3.1738
c24608.graph_c0	4.46213	0	0
c24626.graph_c0	8.95864	19.4614	5.82752
c24630.graph_c1	8.72341	14.2681	3.503
c24636.graph_c0	2.51254	13.5709	3.77724
c24637.graph_c0	4.36036	13.4347	4.35297
c24645.graph_c0	1.49763	8.17053	4.6019
c24645.graph_c1	0.179686	3.84792	2.6182
c24657.graph_c0	0	3.62558	0
c24668.graph_c0	14.7525	3.02679	5.14872
c24673.graph_c0	0.711752	3.26614	0.52913
c24675.graph_c0	0	1.53743	2.42844
c24694.graph_c0	6.31414	22.8514	8.21459
c24698.graph_c0	0.793892	0.255015	2.47882
c24710.graph_c0	4.3428	0.0902911	0
c24721.graph_c0	0.198931	3.19504	0.207044
c24725.graph_c0	4.52936	0.35486	0.57489
c24738.graph_c0	0.186602	14.3857	0.388427
c24781.graph_c0	0.289839	2.89651	0.90498
c24834.graph_c0	2.38202	0.182179	0.413195
c24835.graph_c0	1.94532	0	0.0723095
c24837.graph_c0	1.69419	1.53918	0
c24841.graph_c0	7.91468	2.69644	14.0412
c24842.graph_c0	22.4029	5.07588	0
c24857.graph_c0	5.42483	0.566689	0
c24862.graph_c0	16.0553	0	5.93649
c24876.graph_c0	5.6103	17.8623	14.6945
c24881.graph_c0	0.322334	0.172567	6.03866
c24882.graph_c0	3.61633	3.24423	28.6865
c24887.graph_c0	4.85179	0.216458	9.46814
c24890.graph_c0	11.7744	5.94134	19.5792
c24894.graph_c0	1.56905	0.224006	1.17035
c24900.graph_c0	2.50694	0	0
c24914.graph_c0	2.69425	0.0848479	0
c24920.graph_c0	4.06844	6.18303	15.0252
c24945.graph_c0	8.55721	5.68915	19.3841
c24951.graph_c0	9.6086	5.19474	1.31154
c24957.graph_c0	5.72688	15.6252	11.1704
c24959.graph_c0	0.890544	0.752793	2.73181
c24963.graph_c0	1.72221	0	4.48114
c24984.graph_c0	8.86951	6.71039	19.6786
c24991.graph_c0	4.71893	9.10262	1.38719
c24992.graph_c0	7.42909	0	1.60165
c24994.graph_c0	3.09543	8.16471	7.38629
c25001.graph_c0	7.11068	0.338385	0.32892
c25004.graph_c0	1.40532	5.64272	16.5069
c25014.graph_c0	2.75656	0.193544	0
c25026.graph_c0	5.10636	14.1604	12.3311
c25039.graph_c0	1.73058	0.0579062	1.40716
c25040.graph_c0	3.65518	12.6958	5.01049
c25055.graph_c0	19.8132	1.10302	0.285911
c25065.graph_c0	2.71082	10.673	9.05196
c25066.graph_c0	0.416366	2.97212	0
c25078.graph_c0	2.59979	4.94878	12.3265
c25083.graph_c0	8.26462	15.8618	0
c25094.graph_c0	4.38999	0.42732	0.674972
c25124.graph_c0	4.43724	5.42984	12.4032
c25143.graph_c0	0.413418	0.73777	4.01595
c25204.graph_c0	2.40463	5.93618	12.9307
c25220.graph_c1	11.0996	10.5482	2.66863
c25224.graph_c0	2.0606	8.08998	10.2833
c25231.graph_c0	0.513663	1.97999	1.22961
c25250.graph_c0	4.70376	7.13502	13.1229
c25266.graph_c0	3.93878	45.4274	6.55909
c25282.graph_c0	1.467	4.71231	2.06572
c25306.graph_c0	3.9288	1.5277	0.408904
c25314.graph_c0	4.96599	38.4749	28.2807
c25356.graph_c0	43.472	4.88792	3.97486
c25362.graph_c0	14.264	32.2875	33.6634
c25365.graph_c0	61.0924	4.21345	39.6249
c25369.graph_c0	1.98633	0	0.570302
c25374.graph_c0	4.5887	0	0
c25385.graph_c0	10.0431	24.3176	32.4272
c25385.graph_c1	17.0607	29.7658	46.5095
c25386.graph_c0	2.69569	10.3428	3.97465
c25389.graph_c0	560.197	118.518	113.9
c25390.graph_c0	4.09992	0.80164	0.296845
c25396.graph_c0	4.15973	29.0993	18.7607
c25396.graph_c1	17.3715	47.8293	23.2457
c25411.graph_c0	20.4264	1.38267	65.1225
c25418.graph_c0	1.66227	6.65508	6.31849
c25428.graph_c0	4.20094	0.44981	0.218614
c25440.graph_c0	0.207535	2.07401	0
c25451.graph_c0	15.1098	16.4306	42.0831
c25457.graph_c0	28.9568	52.0698	9.66228
c25466.graph_c0	5.13835	37.2901	28.2251
c25467.graph_c0	6.16284	0.478172	0.557757
c25500.graph_c0	27.0261	5.2124	50.1419
c25522.graph_c0	19.3547	54.0693	41.0919
c25526.graph_c0	13.4829	56.1165	42.1738
c25538.graph_c0	2.93526	6.14609	1.01833
c25544.graph_c0	2.51241	3.76618	0.418381
c25575.graph_c0	2.01643	6.60421	6.91329
c25592.graph_c0	18.8182	37.7683	51.6517
c25595.graph_c0	1.05438	8.80595	0.877911
c25600.graph_c0	13.419	51.6341	66.4931
c25602.graph_c0	26.9943	77.6148	53.3384
c25617.graph_c0	0.767899	1.64443	4.1293
c25629.graph_c0	8.42162	1.32101	1.67486
c25655.graph_c0	15.307	60.2996	36.5588
c25662.graph_c0	0.348859	0.684816	1.81544
c25674.graph_c0	5.00128	0.178502	2.08211
c25709.graph_c0	31.6964	25.2831	4.53878
c25715.graph_c0	4.1201	0.564677	0.480272
c25738.graph_c0	23.6268	42.2676	7.38726
c25739.graph_c0	4.88279	0	0.56466
c25747.graph_c0	5.40715	0.330836	0.321582
c25749.graph_c0	0.88283	0.810238	3.08467
c25784.graph_c0	2.28794	0	1.34593
c25808.graph_c0	5.61732	28.6152	19.1338
c25814.graph_c0	2.62005	2.40461	15.7771
c25815.graph_c0	10.9122	47.4434	27.0593
c25828.graph_c0	12.6557	4.47312	0
c25853.graph_c0	2.38582	2.36299	0.186235
c25864.graph_c0	2.78249	0.439572	0.0474751
c25870.graph_c0	7.07626	2.57394	0
c25879.graph_c0	3.3605	0	3.49756
c25885.graph_c0	4.7483	0.191856	0
c25890.graph_c0	5.05924	0.588817	0.457877
c25892.graph_c0	1.92201	9.94685	2.00041
c25895.graph_c0	8.25957	21.9817	14.2612
c25920.graph_c1	4.00498	15.009	11.1652
c25924.graph_c0	9.53104	28.0263	30.9438
c25938.graph_c0	3.40416	0.705476	4.22875
c25959.graph_c0	9.35006	1.70006	0
c25961.graph_c0	30.914	16.0165	37.4221
c25978.graph_c0	0.30636	3.82703	0.425141
c25986.graph_c0	1.22371	5.8431	1.549
c25991.graph_c0	12.6107	48.2287	16.831
c26000.graph_c0	3.22359	6.47178	0.792169
c26048.graph_c0	6.75827	0.603027	0
c26049.graph_c0	0.0394523	4.35103	0.0410614
c26056.graph_c0	2.55273	0	0.332106
c26058.graph_c0	2.28735	0.240113	2.2406
c26088.graph_c0	4.39732	1.17709	0.194752
c26102.graph_c0	0.797791	5.60721	3.25745
c26116.graph_c0	4.16917	0.133922	0.0867843
c26120.graph_c0	3.92584	0.440371	0.622623
c26127.graph_c1	4.33748	0.654965	0.0578768
c26135.graph_c0	16.9467	62.8655	24.9236
c26142.graph_c0	25.5061	57.5887	14.4073
c26158.graph_c0	9.17057	3.19903	13.4315
c26163.graph_c0	0.830858	0.333611	8.10699
c26167.graph_c0	16.0397	7.916	2.17455
c26170.graph_c0	4.97723	0.592145	1.60341
c26171.graph_c0	77.174	195.71	160.819
c26172.graph_c0	0.239466	0.256405	2.24309
c26178.graph_c0	0.229436	5.6503	0.636782
c26182.graph_c0	45.9902	148.268	97.9266
c26188.graph_c0	4.9447	0	4.54092
c26203.graph_c0	8.1187	11.3387	1.28584
c26232.graph_c0	58.2474	141.238	154.891
c26238.graph_c0	4.51958	25.1406	21.7986
c26253.graph_c0	29.074	65.8809	37.4729
c26254.graph_c0	66.8291	167.865	155.947
c26256.graph_c0	8.59819	44.4976	44.5314
c26256.graph_c1	6.94957	34.8246	24.5923
c26265.graph_c0	0	3.61234	5.00359
c26270.graph_c0	26.1598	109.308	127.501
c26275.graph_c0	46.3233	42.9134	94.6153
c26291.graph_c1	5.56909	0.156922	0.152532
c26307.graph_c0	7.03224	0.764733	0.0571802
c26315.graph_c0	2.15334	4.03491	0.373528
c26321.graph_c0	0.987321	4.08954	1.46026
c26335.graph_c0	6.10311	1.70209	0.443165
c26359.graph_c0	9.51545	0.0387397	0.0188281
c26366.graph_c0	0.759121	0.203205	7.2095
c26368.graph_c0	86.3977	190.873	325.768
c26370.graph_c0	290.407	980.647	164.591
c26378.graph_c0	181.884	109.385	316.6
c26387.graph_c0	3.64225	0	0
c26392.graph_c0	173.25	983.257	480.844
c26392.graph_c1	9.91412	68.1621	43.9893
c26392.graph_c2	202.407	1088.17	624.009
c26394.graph_c0	106.252	686.146	256.388
c26399.graph_c0	2.47666	0.883949	4.94053
c26415.graph_c0	9.37918	4.50187	0.504917
c26422.graph_c0	0.668299	4.19121	0
c26424.graph_c0	5.24594	3.92132	0.103017
c26433.graph_c0	2.7861	0.861806	5.60615
c26444.graph_c0	1604.9	25.0009	2.93498
c26465.graph_c0	874.871	576.517	2021.22
c26468.graph_c0	82.97	717.183	780.493
c26471.graph_c0	1.46439	1.47574	5.55856
c26475.graph_c0	0	10.1639	0
c26481.graph_c0	165.771	375.997	537.011
c26487.graph_c0	14.0409	1656.67	220.827
c26494.graph_c0	9.38387	0.198963	0
c26494.graph_c1	5.19079	0	0
c26494.graph_c2	15.4696	1.94869	0.631394
c26500.graph_c0	10.3156	4.04097	0.314235
c26513.graph_c0	3.25972	2.4723	0.376963
c26520.graph_c0	112.905	395.622	65.4664
c26531.graph_c0	0.858945	2.9124	4.61889
c26544.graph_c0	6.82621	0.685225	0.592052
c26547.graph_c0	1.81944	0.162345	7.8902
c26553.graph_c0	65.3419	163.619	195.025
c26555.graph_c0	0.416604	1.93298	4.04689
c26559.graph_c0	0.872821	4.29393	0.687453
c26563.graph_c0	0.993958	4.56114	1.92121
c26565.graph_c0	15.6267	23.3472	47.4685
c26602.graph_c0	3.187	5.95504	0.065039
c26621.graph_c0	113.474	366.352	240.119
c26627.graph_c0	7.79502	0.927379	0.676079
c26634.graph_c0	9.43613	5.19614	29.7436
c26634.graph_c1	60.0727	31.826	93.8657
c26635.graph_c0	2.072	7.36565	8.88484
c26640.graph_c0	29.797	77.36	50.2782
c26653.graph_c0	9.9772	42.3129	53.7532
c26665.graph_c0	3.3427	3.68319	0.950666
c26668.graph_c0	3.89223	1.40592	0.292842
c26672.graph_c0	3.46847	0.630648	3.4056
c26680.graph_c0	9.5727	29.2248	81.5989
c26684.graph_c0	0.157083	6.55959	0.65396
c26690.graph_c0	0.210235	0	1.60461
c26694.graph_c0	26.9551	67.0145	75.7598
c26696.graph_c0	1.48216	9.52202	9.39592
c26703.graph_c0	15.409	80.5774	41.8837
c26709.graph_c1	6.55937	2.2096	0.460241
c26711.graph_c0	1.78832	9.64247	0.797681
c26719.graph_c0	5.80887	1.00149	1.17842
c26734.graph_c0	1.62531	3.35069	0.605947
c26743.graph_c0	1.01266	7.08405	3.72401
c26745.graph_c0	0.22097	1.7745	2.6448
c26747.graph_c0	0.0943563	2.22268	0
c26758.graph_c0	2.83723	0.164212	4.15009
c26761.graph_c0	4.19744	0.401281	0.312046
c26765.graph_c0	6.48924	7.25036	0.293648
c26777.graph_c0	12.8702	37.7498	83.4182
c26782.graph_c0	7.64581	1.18491	1.46588
c26786.graph_c0	2.78189	1.42458	5.28717
c26810.graph_c0	0	3.86765	2.68533
c26822.graph_c0	6.80741	1.34406	0.452238
c26826.graph_c0	7.96651	0	0.251256
c26829.graph_c0	3.38812	4.48597	0.530842
c26833.graph_c0	1.45828	4.59244	2.23199
c26835.graph_c0	0.139765	0.448954	4.50943
c26836.graph_c0	87.0559	36.6647	88.7309
c26840.graph_c0	5.67806	2.68638	0.343584
c26841.graph_c1	5.97478	2.39903	0.485818
c26846.graph_c0	79.892	65.9409	16.8833
c26853.graph_c0	12.8876	0.104014	0
c26857.graph_c0	1.27338	2.35505	7.46995
c26865.graph_c0	6.78707	0	0
c26871.graph_c0	33.6689	78.0444	68.184
c26887.graph_c0	0	5.81665	2.53453
c26909.graph_c0	6.37897	0.146886	0.0713887
c26911.graph_c0	28.9644	86.7835	87.1361
c26912.graph_c0	1.4626	3.07189	0.468387
c26933.graph_c0	3.91031	2.97736	0.4522
c26934.graph_c0	16.5154	54.735	59.8431
c26953.graph_c0	0.447034	0.837647	3.37318
c26964.graph_c0	42.238	117.685	81.2191
c27000.graph_c0	3.21266	21.4995	16.2169
c27009.graph_c0	0.34125	5.84622	0.109283
c27014.graph_c0	7.39946	162.419	25.8135
c27021.graph_c0	26.8518	96.4809	59.1613
c27023.graph_c0	10.0716	43.5547	181.66
c27028.graph_c0	2.46365	4.11773	0.250159
c27035.graph_c0	0.556109	4.91243	2.89396
c27045.graph_c0	3.27272	1.3952	0
c27052.graph_c0	0.991598	2.60609	4.50346
c27062.graph_c0	38.7802	19.3159	99.9492
c27064.graph_c0	6.12693	0.80274	0.75338
c27094.graph_c0	0.886372	2.56249	0.707268
c27095.graph_c0	2.98179	1.17885	0.0954893
c27130.graph_c0	4.60317	9.88999	15.1292
c27151.graph_c0	0.608796	3.04202	0.422418
c27160.graph_c1	3.18134	0.0830824	0
c27160.graph_c2	8.62015	0.222407	0
c27189.graph_c0	10.7961	30.4576	20.8119
c27190.graph_c0	1.38558	7.03333	7.15707
c27192.graph_c0	3.22784	14.3304	1.22908
c27200.graph_c0	10.1012	3.34195	1.06314
c27202.graph_c0	1.76824	2.43426	8.80742
c27217.graph_c0	9.71641	22.8812	15.6562
c27222.graph_c1	2.51902	0.919503	0.0595856
c27229.graph_c1	11.9438	0.847441	0.14977
c27241.graph_c0	8.81108	15.3393	54.8908
c27264.graph_c0	4.401	0.0923982	0.0898137
c27275.graph_c0	2.56773	1.4232	0.125763
c27280.graph_c0	3.41621	0.397593	0.0772944
c27290.graph_c0	2.77477	14.261	6.81554
c27298.graph_c0	1.91455	1.48054	6.97423
c27312.graph_c0	2.15067	1.48568	0
c27318.graph_c0	2.24556	1.42965	6.50612
c27322.graph_c0	3.16748	14.9942	16.1363
c27328.graph_c0	0.493685	3.5681	0.128455
c27333.graph_c0	24.2958	6.6923	0
c27369.graph_c0	26.234	19.2106	5.28323
c27376.graph_c1	5.47917	15.3187	9.71561
c27383.graph_c0	17.9217	5.86511	18.7404
c27402.graph_c0	19.6006	2.82805	4.91916
c27412.graph_c0	4.34242	12.2358	30.4474
c27423.graph_c0	7.72788	22.375	14.773
c27426.graph_c0	6.26467	0.108191	0.525821
c27427.graph_c0	1.46919	0.786558	3.87376
c27434.graph_c0	6.8203	4.15501	0.530346
c27440.graph_c0	1.78569	0.980516	0
c27440.graph_c1	7.97203	7.86908	0
c27456.graph_c0	3.45871	4.3206	0
c27467.graph_c0	2.13503	1.98124	0.246901
c27476.graph_c0	0.211337	0.226286	3.40932
c27485.graph_c0	0.175906	2.13463	0.427189
c27495.graph_c0	8.93711	4.88229	0.189829
c27508.graph_c0	0	5.08121	0.691471
c27514.graph_c0	0.208608	0.111682	3.58243
c27537.graph_c0	2.07556	1.63754	9.43673
c27540.graph_c0	1.92381	5.18526	6.4211
c27555.graph_c0	0.245219	3.54463	0.574248
c27556.graph_c1	0.215087	3.10907	0.67158
c27567.graph_c0	3.8367	9.77575	4.03016
c27572.graph_c0	6.87247	1.26148	6.33532
c27574.graph_c0	2.75325	0.300817	0.175442
c27575.graph_c0	1.10267	5.87056	7.93788
c27584.graph_c0	2.44799	10.2904	3.01966
c27585.graph_c0	1.54396	0.225432	1.75301
c27593.graph_c0	0.202086	0.216381	3.26009
c27607.graph_c0	0	3.8152	5.32768
c27608.graph_c0	6.61658	0	0
c27611.graph_c0	12.2304	0.0909413	1.32596
c27612.graph_c0	1.13901	0.791078	2.56317
c27615.graph_c0	31.6548	7.71721	2.2204
c27638.graph_c0	3.87165	1.04607	0.188297
c27639.graph_c0	0.35001	2.19507	0.884695
c27640.graph_c0	14.0599	0.857534	0.0926164
c27652.graph_c0	9.12078	0.107318	0
c27655.graph_c0	24.4535	5.97337	13.2577
c27678.graph_c0	1.87087	5.03664	1.0014
c27683.graph_c0	2.49317	7.03785	32.3178
c27683.graph_c1	2.29027	3.40594	19.864
c27690.graph_c0	4.07663	0.223846	0
c27717.graph_c0	1.46881	0.241955	3.17502
c27720.graph_c0	0.242517	2.16393	0.588952
c27724.graph_c0	1.68188	0.131769	1.36622
c27741.graph_c0	4.33124	0	0.227016
c27755.graph_c0	9.6798	4.4731	14.7407
c27762.graph_c0	5.75405	2.54267	7.60475
c27765.graph_c0	44.7673	0.320629	0
c27765.graph_c1	41.5159	0.621094	0.172492
c27797.graph_c0	0.0810985	2.17088	0.253219
c27820.graph_c0	2.42642	0.321409	0.15621
c27829.graph_c0	6.87857	1.85258	7.3348
c27850.graph_c0	0	6.7881	6.32558
c27852.graph_c0	0	4.98092	0.172914
c27857.graph_c0	5.17185	13.0818	23.6375
c27860.graph_c0	2.02976	0	1.61962
c27878.graph_c0	8.68443	21.1106	19.9339
c27912.graph_c0	0	15.2801	1.55798
c27920.graph_c0	2.89958	0	1.56928
c27923.graph_c0	0	8.92075	0.091276
c27931.graph_c0	3.83204	0	0
c27948.graph_c0	15.2622	0.558261	0
c27953.graph_c0	5.89353	0.967598	5.84766
c27954.graph_c0	0.0798956	3.42188	0
c27990.graph_c0	9.65601	36.3781	16.8986
c28004.graph_c0	3.06247	0.674207	0.0297886
c28014.graph_c0	13.5041	2.51721	5.17811
c28021.graph_c0	4.49479	0.844339	0
c28038.graph_c0	1.1733	4.10388	0.40705
c28042.graph_c0	0.871165	4.43074	1.05781
c28063.graph_c0	2.90059	1.30106	0.203979
c28075.graph_c0	13.1995	2.64278	3.90914
c28077.graph_c0	5.53488	10.284	0.508291
c28081.graph_c0	8.40942	1.57356	0.594824
c28090.graph_c0	10.4968	24.8562	14.6646
c28103.graph_c0	6.8976	4.74783	0.732543
c28112.graph_c0	3.1189	0.31308	0.507204
c28118.graph_c0	3.30337	1.66134	0
c28122.graph_c0	0.877389	3.8361	3.37367
c28139.graph_c0	6.69039	3.85272	1.07277
c28146.graph_c1	26.2133	39.6089	8.38117
c28150.graph_c0	0.0929126	4.44366	3.54575
c28167.graph_c1	4.65648	76.0108	2.28604
c28190.graph_c0	4.91644	0.426828	0.414889
c28195.graph_c0	63.1242	1.29482	0
c28205.graph_c0	10.1886	0.454553	0.552298
c28209.graph_c0	2.02768	3.16227	0.367023
c28218.graph_c0	1.39227	2.2734	0.289811
c28225.graph_c0	0.119881	0.513443	2.9321
c28239.graph_c0	5.69119	1.26413	0.551372
c28264.graph_c0	6.95541	35.3752	11.9445
c28271.graph_c0	17.3791	8.47103	22.0025
c28287.graph_c0	1.3774	7.37414	3.62874
c28307.graph_c0	3.18102	0.71706	0.209101
c28311.graph_c0	52.4094	2.70547	1.10282
c28331.graph_c0	3.55025	65.7552	5.95157
c28335.graph_c0	16.3615	33.1737	5.19003
c28348.graph_c0	0.40083	3.75536	0.208589
c28354.graph_c0	3.41167	0.249068	2.34031
c28369.graph_c0	7.57831	1.71119	0.697525
c28371.graph_c0	10.0145	17.5555	27.6328
c28379.graph_c0	4.30297	0.58506	0.355435
c28434.graph_c0	6.33912	0.245332	0.87439
c28436.graph_c0	5.59877	0.495438	1.97448
c28441.graph_c0	7.50749	17.3261	13.386
c28456.graph_c0	3.78107	1.31304	0.265898
c28457.graph_c0	10.9398	0.30035	1.7517
c28461.graph_c0	6.46954	1.11378	0.501705
c28486.graph_c0	2.64102	1.01179	0.0252177
c28487.graph_c0	1.02932	5.79327	3.59849
c28492.graph_c0	1.50675	8.30084	4.24932
c28514.graph_c0	6.38314	1.09779	3.99297
c28533.graph_c0	7.0457	19.6628	16.9285
c28553.graph_c0	0	2.65507	1.9117
c28562.graph_c0	3.99741	1.54367	0
c28573.graph_c0	0	3.93498	7.24721
c28595.graph_c0	0.0435291	3.16935	0.40774
c28597.graph_c0	6.03525	0	1.79469
c28600.graph_c0	3.06306	4.9927	0
c28601.graph_c0	12.2145	2.54004	3.41456
c28613.graph_c0	8.16367	16.3896	23.4838
c28625.graph_c1	29.2105	21.4543	3.76884
c28636.graph_c0	0	14.4353	23.164
c28653.graph_c0	3.05824	16.8406	9.39735
c28664.graph_c0	4.34021	2.04085	0.286809
c28668.graph_c0	4.64642	18.5332	13.0312
c28671.graph_c0	14.3172	3.78908	0.920773
c28672.graph_c0	121.619	350.53	165.055
c28674.graph_c0	1172.49	369.202	902.18
c28680.graph_c0	509.471	1392.9	1211.17
c28688.graph_c0	5.31561	49.4428	0.24054
c28689.graph_c0	7.17984	0	2.22045
c28695.graph_c0	4.73202	19.8064	11.1932
c28697.graph_c0	241.941	36.9148	49.1798
c28708.graph_c0	2.52544	0.883511	0.208194
c28732.graph_c0	110.073	528.235	40.253
c28749.graph_c0	5.39742	15.226	10.0108
c28759.graph_c0	12.4824	5.58155	12.5117
c28763.graph_c0	151.816	705.149	517.606
c28766.graph_c0	96.5296	769.788	26.4729
c28780.graph_c0	0	0	1.89283
c28781.graph_c0	145.452	51.0152	156.718
c28819.graph_c0	7.06216	20.6472	8.10607
c28821.graph_c0	29.9116	19.971	43.648
c28823.graph_c0	2.17262	27.4172	11.2254
c28848.graph_c0	15.0881	16.5691	4.14982
c28869.graph_c0	14.1183	13.7192	3.97548
c28885.graph_c0	259.209	153.312	365.179
c28890.graph_c0	37.0017	4.13089	1.7339
c28891.graph_c1	753.328	477.559	1313.71
c28897.graph_c0	0.116317	2.4909	0.121061
c28898.graph_c0	157.112	89.3636	204.986
c28900.graph_c0	1033.26	28.5201	0.663214
c28903.graph_c0	21.3428	2.18988	0.240329
c28924.graph_c0	3.92492	12.1686	15.1816
c28931.graph_c0	17.308	40.2505	33.6725
c28946.graph_c0	12.9629	42.5586	23.3793
c29003.graph_c0	6.88696	3.53127	10.2975
c29005.graph_c0	15.2998	6.19164	1.37923
c29006.graph_c0	32.8237	5.83548	7.60597
c29010.graph_c0	0.0388686	52.5635	11.2664
c29014.graph_c0	9.34741	21.8894	15.3629
c29019.graph_c0	56.2905	13.0697	7.08936
c29033.graph_c0	74.4198	17.3051	29.2679
c29037.graph_c0	1.3726	8.91613	1.80954
c29045.graph_c0	20.1841	56.6802	41.6184
c29052.graph_c0	96.8057	17.2715	1.40498
c29064.graph_c0	26.8262	66.5337	44.3022
c29075.graph_c0	7.38215	17.3246	32.8379
c29083.graph_c0	7.97279	8.65264	38.1106
c29092.graph_c0	8.82361	21.0559	22.5356
c29093.graph_c0	19.9425	21.1339	60.094
c29126.graph_c0	0.357161	31.5501	0.805411
c29133.graph_c0	11.5906	37.2315	20.8503
c29146.graph_c0	1.01372	0.930364	4.82315
c29157.graph_c0	8.12127	29.8223	3.23351
c29159.graph_c0	33.9479	2.09532	7.61553
c29160.graph_c0	4.07573	4.1822	0
c29181.graph_c0	0.389261	2.50077	0.347261
c29193.graph_c0	5.87997	2.83316	13.4636
c29207.graph_c0	8.47063	0.529073	0.0734677
c29212.graph_c0	69.5239	5.25471	0.851289
c29214.graph_c0	4.46131	0.227471	0
c29215.graph_c0	0.705752	2.954	0.801313
c29217.graph_c0	5.83049	30.9489	0
c29222.graph_c0	26.9246	15.4284	3.85634
c29232.graph_c0	5.7823	33.8377	29.4353
c29252.graph_c0	14.3761	32.599	22.1714
c29255.graph_c0	9.30505	34.4185	20.3474
c29265.graph_c0	42.6064	35.1454	10.2005
c29270.graph_c0	0.915705	28.1071	0.635369
c29274.graph_c0	2.09168	12.9288	24.5406
c29277.graph_c1	0.565796	2.33673	0.0841248
c29280.graph_c0	6.9779	15.5599	24.9857
c29292.graph_c0	3.68946	9.14245	18.9254
c29295.graph_c0	8.44006	7.27562	27.0229
c29314.graph_c0	82.0322	2.00705	0.308039
c29324.graph_c0	55.7306	3.78456	0
c29346.graph_c0	0	2.28644	0
c29364.graph_c0	19.1616	9.03896	41.6992
c29364.graph_c1	8.66351	4.911	24.266
c29386.graph_c0	1.58979	12.1661	16.449
c29405.graph_c0	27.7506	20.7207	45.1936
c29409.graph_c0	19.6871	44.279	45.4443
c29413.graph_c0	22.7931	67.3636	70.5102
c29418.graph_c0	14.5519	140.512	15.1454
c29423.graph_c0	0	2.97552	0.262935
c29428.graph_c0	9.73518	7.01603	19.7774
c29429.graph_c0	7.89642	9.23424	20.6409
c29442.graph_c0	9.50475	26.7364	16.2638
c29448.graph_c0	4.34743	34.3613	16.0266
c29455.graph_c0	18.5769	47.527	75.7983
c29464.graph_c0	24.8783	4.05362	14.9166
c29465.graph_c0	66.1432	43.0691	124.254
c29469.graph_c0	24.4373	68.4855	33.2097
c29507.graph_c0	23.3013	97.7009	50.9636
c29514.graph_c0	6.22903	20.5861	11.1584
c29516.graph_c0	2.75484	0.798157	0.101195
c29533.graph_c0	36.3423	5.23422	6.4754
c29545.graph_c0	70.5879	53.2152	126.062
c29550.graph_c0	46.626	109.262	76.1411
c29551.graph_c0	64.0983	71.0619	15.9402
c29567.graph_c0	15.7709	45.074	27.3991
c29591.graph_c0	22.2254	69.9927	25.7085
c29596.graph_c0	30.1014	78.0698	26.1946
c29602.graph_c0	2.17925	0.340288	0
c29604.graph_c0	4.45214	15.6632	24.5753
c29608.graph_c0	0.912431	9.6069	16.7771
c29621.graph_c0	22.1693	60.8599	22.9718
c29623.graph_c1	8.00628	1.32815	1.291
c29636.graph_c0	64.1078	216.33	140.275
c29647.graph_c0	15.1247	8.03545	20.9687
c29656.graph_c0	22.2106	43.11	63.1159
c29666.graph_c0	87.5789	25.111	53.9024
c29668.graph_c0	12.6763	55.7806	90.3955
c29669.graph_c0	5.47803	16.2559	19.3035
c29669.graph_c1	16.5396	41.1254	54.894
c29676.graph_c0	32.0615	74.4513	56.2524
c29711.graph_c0	9.26786	45.8435	170.433
c29721.graph_c0	11.4506	6.62928	15.7978
c29727.graph_c0	4.97644	13.3831	9.81679
c29729.graph_c0	16.3137	2.75306	27.1296
c29762.graph_c0	5.97463	99.8705	7.2877
c29765.graph_c0	0.978269	1.87048	0
c29774.graph_c0	0.351813	2.26019	1.09849
c29784.graph_c0	0.175775	2.94859	1.82944
c29790.graph_c0	0	4.20743	0.766827
c29798.graph_c0	1.17893	3.84184	0.32009
c29799.graph_c0	7.75719	3.41614	0.933236
c29804.graph_c0	0.219967	3.17961	0.114469
c29808.graph_c0	2.17689	1.48329	0.068657
c29810.graph_c0	6.20839	1.93205	0.413798
c29816.graph_c0	0.609662	3.14874	1.41836
c29819.graph_c0	1.72361	2.26498	8.31724
c29824.graph_c0	4.60972	0.897416	5.29619
c29825.graph_c0	0.58691	3.00248	6.71932
c29840.graph_c0	0	5.01622	0.157287
c29844.graph_c0	3.3481	0.0820977	0
c29847.graph_c0	0	8.49336	8.62435
c29849.graph_c0	0.609294	3.31633	2.16666
c29854.graph_c0	3.0808	0.621498	0.185881
c29865.graph_c0	0.957566	3.66179	0.569498
c29866.graph_c0	2.04296	12.9708	3.53383
c29877.graph_c0	0.0380914	0.938075	3.21125
c29895.graph_c0	1.87617	12.7564	0
c29903.graph_c0	4.1023	0.54906	0.686188
c29905.graph_c0	1.69345	8.15958	6.16882
c29914.graph_c0	11.7674	0.0830758	0
c29916.graph_c1	6.06453	1.57317	0.618173
c29917.graph_c0	3.61412	0.85995	0.0522435
c29939.graph_c0	9.96973	2.33045	1.82682
c29941.graph_c0	0.128149	5.90019	0
c29942.graph_c0	1.54825	7.27798	2.39744
c29943.graph_c0	0.130449	2.65385	4.20885
c29946.graph_c0	0	1.18262	6.28866
c29949.graph_c0	0.369324	1.05453	3.33136
c29962.graph_c0	7.73549	3.0625	0.0676554
c29968.graph_c0	0.0367042	2.59383	1.52805
c29976.graph_c0	0	2.48866	2.8061
c29979.graph_c0	15.1718	0	0.119626
c29986.graph_c0	6.24909	4.06986	0
c29987.graph_c0	2.21353	7.34734	4.49244
c29989.graph_c0	1.02588	5.8061	1.06773
c29999.graph_c0	0	2.21362	2.06205
c30005.graph_c0	8.20287	1.80512	0.654711
c30005.graph_c1	4.74692	0.331481	0.429612
c30022.graph_c0	0	3.37367	0.166744
c30026.graph_c0	0.673192	2.65389	0.843963
c30032.graph_c0	8.74331	3.10591	0.706582
c30033.graph_c0	10.9274	2.20851	1.05053
c30034.graph_c0	12.4322	1.70339	1.34912
c30040.graph_c0	0.95608	7.4219	3.60715
c30045.graph_c0	2.04529	0.282577	2.40339
c30048.graph_c0	1.5049	8.9244	2.04821
c30051.graph_c0	3.89558	0.493951	0.853572
c30063.graph_c0	0	1.87043	3.31538
c30064.graph_c0	6.95324	2.98323	0.78168
c30070.graph_c0	14.809	6.47206	1.57276
c30073.graph_c0	7.89233	1.04329	0.202821
c30073.graph_c1	4.98541	0.817928	0.292913
c30075.graph_c0	4.67859	2.15928	0
c30088.graph_c0	4.23146	0	0
c30094.graph_c0	1.23592	4.96254	6.11006
c30098.graph_c1	12.264	3.97627	1.45536
c30105.graph_c0	3.35621	0.0733392	0.142576
c30109.graph_c0	0.346527	3.89591	0.540991
c30112.graph_c0	1.35731	3.98317	1.67427
c30115.graph_c0	12.2714	0.924522	1.36161
c30128.graph_c0	0.414727	1.46541	1.76973
c30135.graph_c0	4.70561	2.84221	8.91603
c30136.graph_c0	14.8005	4.01038	1.44611
c30140.graph_c0	0.126977	9.51715	3.83253
c30144.graph_c0	2.03812	9.4566	3.25258
c30144.graph_c1	1.88839	8.73121	3.30546
c30151.graph_c0	3.13638	15.7251	2.1762
c30158.graph_c0	0.976631	7.08387	2.95103
c30159.graph_c0	0.600332	0.714219	3.54063
c30174.graph_c0	0	0	3.9115
c30188.graph_c0	0.045529	3.75371	0.142158
c30189.graph_c0	2.67536	7.71239	6.6399
c30193.graph_c0	0.213402	1.14249	5.21949
c30200.graph_c0	11.7336	2.15376	6.54224
c30205.graph_c0	12.8562	3.11153	1.55053
c30217.graph_c0	2.64064	0.19278	0.437237
c30230.graph_c0	6.92941	0	6.28742
c30231.graph_c0	1.41901	0.357502	3.04064
c30237.graph_c0	0	4.21539	11.9998
c30260.graph_c0	8.0019	10.4987	0
c30266.graph_c0	1.90068	11.0063	2.2608
c30271.graph_c0	3.44629	0.10543	0.819851
c30275.graph_c0	1.01999	150.209	0.985768
c30280.graph_c0	3.10017	7.93223	3.81328
c30281.graph_c0	21.9187	29.7497	123.917
c30299.graph_c0	10.1783	1.39722	4.48184
c30302.graph_c0	1.52918	6.18553	4.5978
c30302.graph_c1	4.21945	15.2298	4.39155
c30315.graph_c0	7.61302	0	1.14404
c30329.graph_c0	3.37897	0.463845	0.180348
c30332.graph_c0	11.8647	7.20521	0
c30335.graph_c0	0.125955	0.337161	4.78486
c30339.graph_c0	3.02482	0.111682	1.08558
c30341.graph_c0	6.39325	3.29598	0.410741
c30346.graph_c0	3.56884	0.824199	0.145663
c30355.graph_c0	6.68765	2.61366	6.682
c30358.graph_c0	2.54323	1.08925	0.0588214
c30360.graph_c0	5.95004	1.23308	4.99413
c30365.graph_c0	2.33395	2.82787	0.38355
c30366.graph_c0	8.26229	2.19643	5.98985
c30379.graph_c0	1.9906	7.36305	6.1212
c30386.graph_c0	11.6437	0	3.01083
c30402.graph_c0	1.19197	2.7349	0.13292
c30423.graph_c0	0	3.17229	1.4133
c30426.graph_c0	3.06524	0	0.765663
c30432.graph_c0	3.51925	0.993807	0.201252
c30433.graph_c0	0.742917	3.18187	0.11046
c30444.graph_c0	0.335868	3.32654	0.52435
c30455.graph_c0	1.19208	0	3.4358
c30456.graph_c0	6.31049	0	2.43255
c30475.graph_c0	10.4495	1.04721	0.267874
c30476.graph_c0	1.63969	8.19315	4.83527
c30489.graph_c0	16.1544	55.1859	43.5772
c30494.graph_c0	6.75864	5.54302	0
c30504.graph_c0	3.31818	10.9125	0.49336
c30509.graph_c0	13.4735	1.88173	0.406466
c30511.graph_c0	4.87869	0.298502	0.870458
c30519.graph_c0	5.28923	0.120497	1.17127
c30522.graph_c0	0.787867	7.40491	0.911112
c30523.graph_c0	6.06266	2.76147	0.340536
c30534.graph_c0	7.0553	0.404698	0
c30535.graph_c0	0.411258	4.35945	3.63827
c30538.graph_c0	4.24168	1.47162	0.024663
c30558.graph_c0	9.16738	1.39539	1.07573
c30564.graph_c0	0.228253	2.93278	4.63246
c30569.graph_c0	26.7423	65.6462	34.8136
c30580.graph_c0	2.6803	0.807158	3.48703
c30582.graph_c0	27.4571	5.69393	1.69428
c30611.graph_c0	0	4.39756	1.92355
c30613.graph_c0	6.07089	0	2.33298
c30615.graph_c0	1.92974	1.06645	3.56337
c30617.graph_c0	0.310801	3.16146	1.39095
c30618.graph_c0	0.997807	1.9231	7.89263
c30625.graph_c0	6.72322	0.654436	1.39153
c30628.graph_c0	4.67706	1.26782	5.484
c30631.graph_c0	0.198717	4.89379	0.289551
c30633.graph_c0	3.41529	2.25039	7.51932
c30636.graph_c0	7.69359	1.19389	4.17777
c30648.graph_c0	1.54522	2.61966	5.82989
c30660.graph_c0	5.56881	2.41189	0.390738
c30662.graph_c0	0.138554	4.52484	2.88411
c30675.graph_c0	0.451962	6.12981	0
c30688.graph_c0	4.53314	3.41877	0.697449
c30690.graph_c0	6.76791	0.785054	2.01535
c30697.graph_c0	1.23459	2.45499	4.09958
c30698.graph_c0	0	2.36163	6.12151
c30703.graph_c0	0.740385	4.83582	3.6988
c30704.graph_c0	13.3993	0	0.581074
c30706.graph_c0	1.71682	8.43928	2.35538
c30707.graph_c0	8.61257	0	0
c30713.graph_c0	0.257262	4.1319	5.99771
c30715.graph_c0	4.64036	0.3549	0.574956
c30719.graph_c0	1.16404	4.51394	1.50622
c30721.graph_c0	10.0431	0.610996	1.18781
c30741.graph_c0	4.87593	2.44942	0.435941
c30742.graph_c0	0.156928	7.22523	4.5732
c30748.graph_c0	2.144	2.25151	0.386211
c30750.graph_c0	7.15442	0.364786	0.354582
c30769.graph_c1	14.1038	0.564539	12.484
c30787.graph_c0	0.18805	4.83245	4.30584
c30789.graph_c0	0.131098	4.49189	0.81867
c30791.graph_c0	0.14152	5.00052	2.22411
c30792.graph_c0	5.518	0	1.55911
c30793.graph_c0	3.3606	0	1.97694
c30793.graph_c1	2.5411	14.6926	0.352633
c30808.graph_c1	1.12276	5.77047	5.72592
c30809.graph_c0	4.38731	0.618112	0.240329
c30814.graph_c0	0.244268	3.57447	0.127115
c30826.graph_c0	0.336895	6.13233	0.876588
c30831.graph_c0	1.44133	5.01569	4.78163
c30836.graph_c0	6.3524	2.31878	0.150261
c30841.graph_c0	3.12942	1.82322	0.167643
c30844.graph_c0	0.190193	4.17476	0.197951
c30846.graph_c0	3.65455	0.420759	0.572586
c30850.graph_c0	4.98962	0.193571	0.526839
c30854.graph_c0	2.71961	0.956795	0.0808724
c30874.graph_c0	1.51439	4.21594	2.20662
c30877.graph_c0	5.17608	0	0
c30909.graph_c0	23.6993	11.4858	1.81748
c30916.graph_c1	9.7304	1.37895	1.04251
c30922.graph_c0	7.41245	0.422169	1.23108
c30924.graph_c0	7.62646	0	0
c30929.graph_c0	0.504049	2.53661	0.786911
c30933.graph_c0	5.92133	0.812844	0
c30934.graph_c0	0.411502	2.99615	2.05577
c30945.graph_c0	6.14429	0.706826	0.845606
c30948.graph_c0	5.2243	0.543092	0.369531
c30955.graph_c0	5.26463	0.438811	0.131242
c30963.graph_c0	12.9485	5.36091	0
c30964.graph_c0	3.53878	6.68315	1.59505
c30973.graph_c0	6.04172	0.524521	0.764774
c30981.graph_c0	6.41764	6.26079	0.593724
c30986.graph_c0	8.84961	4.54039	0.383773
c30992.graph_c0	8.61191	0.350168	3.63065
c30994.graph_c0	0.287881	5.63647	0.0856063
c31001.graph_c0	0.342736	1.37617	6.33169
c31008.graph_c0	1.72696	4.99262	4.78107
c31018.graph_c0	6.87704	2.65693	8.41194
c31020.graph_c0	4.09869	2.1873	0.449755
c31042.graph_c0	3.74394	1.20384	0.21063
c31044.graph_c0	8.98095	2.63458	7.81072
c31050.graph_c0	1.29422	3.53148	4.77971
c31061.graph_c0	4.57618	2.63277	0.284348
c31065.graph_c1	2.11995	6.61655	2.25336
c31076.graph_c0	3.36855	0	0
c31091.graph_c0	17.788	40.5974	21.224
c31095.graph_c0	8.67593	0.703761	0.684075
c31099.graph_c0	0.789069	1.37294	7.95588
c31108.graph_c0	1.94751	3.23576	7.19912
c31115.graph_c0	2.55807	1.42429	6.07028
c31117.graph_c0	0.0881777	1.60506	2.56968
c31121.graph_c0	5.4441	4.67363	1.22309
c31133.graph_c0	9.48172	2.90069	0.512646
c31150.graph_c0	5.7552	0.589044	0.308306
c31153.graph_c0	10.477	1.66194	1.13082
c31162.graph_c0	0.295656	4.79377	0.307715
c31165.graph_c0	0.353953	0.757981	2.14894
c31178.graph_c0	3.51567	15.347	8.06869
c31182.graph_c0	2.32884	5.88761	10.9409
c31192.graph_c0	2.04505	0.517569	0.0773987
c31193.graph_c0	0.288688	2.47287	1.1017
c31194.graph_c0	0.481124	17.9661	18.3399
c31209.graph_c0	0.685116	2.93431	0
c31210.graph_c0	0.400192	2.50508	0.640792
c31229.graph_c0	1.54452	1.35309	0
c31234.graph_c0	13.5117	0.0513032	0.0498682
c31262.graph_c0	4.25001	10.4015	10.3475
c31270.graph_c0	0	13.4357	3.40692
c31276.graph_c0	7.66374	3.69387	0.674734
c31283.graph_c0	2.72275	0.336386	0.181654
c31285.graph_c1	3.19351	13.0263	9.17991
c31290.graph_c0	22.5966	4.80586	1.44975
c31301.graph_c0	1.29829	4.04402	1.25912
c31314.graph_c0	17.6158	3.16318	1.59429
c31316.graph_c0	49.5022	1.35041	0.656321
c31322.graph_c0	0.0583447	3.18606	0.0910866
c31324.graph_c0	7.05656	4.74499	1.36116
c31338.graph_c0	9.19478	0.518167	0.923402
[truncated: 3,419 more rows]
